# Supplementary material for: Nitrite-driven anaerobic methane oxidation by oxygenic bacteria
Source: Springer Nature journal article supplement (doi:10.1038/nature08883), 2010-03-01
Supplement: 41586_2010_BFnature08883_MOESM324_ESM.pdf [file 41586_2010_BFnature08883_MOESM324_ESM.pdf]

## SUPPLEMENTARY INFORMATION

**Supplementary Table 1** | General genome properties.

| Characteristic     | Value     |
|--------------------|-----------|
| Size (bp)          | 2,752,854 |
| GC content (%)     | 58.58     |
| Coding density (%) | 89.24     |
| rRNAs              | 3         |
| tRNAs              | 47        |
| miscRNAs           | 4         |
| Repeat content (%) | 2.97      |

**Supplementary Table 2** | 16S and 23S rDNA-containing contigs from 454 pyrosequencing demonstrating the diverse bacterial side community in enrichment culture “Twente”.

| Contig no. | Length (nt)            | no. reads | Best BLAST hit (accession no.) <sup>*</sup>                   | E-value             | % id | Phylum affiliation    |
|------------|------------------------|-----------|---------------------------------------------------------------|---------------------|------|-----------------------|
| 00002      | 153                    | 5         | Uncultured <i>Acidobacterium</i> clone 16S rDNA (AM936563.1)  | $1 \times 10^{-64}$ | 96   | <i>Acidobacteria</i>  |
|            |                        |           | <i>Lewinella lutea</i> FYK2402M69 16S rDNA (AB301494.1)       | $5 \times 10^{-38}$ | 85   | <i>Bacteroidetes</i>  |
| 00158      | 151                    | 3         | Uncultured <i>Hyphomicrobium</i> clone 16S rDNA (EU634808.1)  | $1 \times 10^{-64}$ | 97   | <i>Proteobacteria</i> |
|            |                        |           | <i>Hyphomicrobium sulfonivorans</i> 25S 16S rDNA (AY305006.1) | $7 \times 10^{-62}$ | 96   | <i>Proteobacteria</i> |
| 05954      | 127 (293) <sup>†</sup> | 4         | Uncultured bacterium clone 23S rDNA (EU686587.1)              | $1 \times 10^{-39}$ | 90   | Unclassified          |

|       |                        |   |                                                                     |                      |    |                       |
|-------|------------------------|---|---------------------------------------------------------------------|----------------------|----|-----------------------|
|       |                        |   | <i>Gemmata obscuriglobus</i> DSM 5831T 23S rDNA (AF245369.1)        | $1 \times 10^{-39}$  | 88 | <i>Planctomycetes</i> |
| 08725 | 156                    | 3 | Uncultured bacterium clone 23S rDNA (EU917532.1)                    | $1 \times 10^{-24}$  | 90 | Unclassified          |
|       |                        |   | <i>Geobacter uraniireducens</i> Rf4 23S rDNA (CP000698.1)           | $2 \times 10^{-22}$  | 84 | <i>Proteobacteria</i> |
| 11380 | 282                    | 2 | Uncultured <i>Myxococcales</i> clone 16S rDNA (EU193072.1)          | $3 \times 10^{-134}$ | 98 | <i>Proteobacteria</i> |
|       |                        |   | <i>Desulfuromonas svalbardensis</i> 103 16S rDNA (AY835391.1)       | $8 \times 10^{-103}$ | 92 | <i>Proteobacteria</i> |
| 12461 | 281                    | 3 | Uncultured bacterium clone 16S rDNA (EU703011.1)                    | $3 \times 10^{-127}$ | 96 | Unclassified          |
|       |                        |   | <i>Dehalococcoides</i> sp. BHI80-52 16S rDNA (AJ431247.1)           | $3 \times 10^{-114}$ | 93 | <i>Chloroflexi</i>    |
| 12631 | 498                    | 9 | Uncultured bacterium clone 16S rDNA (EF522841.1)                    | 0.0                  | 99 | Unclassified          |
|       |                        |   | <i>Planctomycete</i> str. GMD14H10 16S rDNA (AY162122.1)            | $4 \times 10^{-116}$ | 80 | <i>Planctomycetes</i> |
| 13213 | 158                    | 2 | <i>Acidithiobacillus thiooxidans</i> 8930P 23S rDNA (AF362021.1)    | $2 \times 10^{-36}$  | 83 | <i>Proteobacteria</i> |
|       |                        |   | <i>Acidithiobacillus thiooxidans</i> 8930P 23S rDNA (AF362021.1)    | $2 \times 10^{-36}$  | 83 | <i>Proteobacteria</i> |
| 14774 | 305                    | 3 | Uncultured bacterium clone 16S rDNA (FJ478657.1)                    | $5 \times 10^{-137}$ | 97 | Unclassified          |
|       |                        |   | <i>Desulfonatronum</i> sp. ASO4-2 16S rDNA (FJ469578.1)             | $8 \times 10^{-84}$  | 87 | <i>Proteobacteria</i> |
| 18707 | 244                    | 3 | Uncultured bacterium clone 16S rDNA (AY741700.1)                    | $2 \times 10^{-104}$ | 95 | Unclassified          |
|       |                        |   | <i>Chlorobi</i> bacterium str. Mat9-16 16S rDNA (AB478415.1)        | $3 \times 10^{-88}$  | 90 | <i>Chlorobi</i>       |
| 18822 | 288                    | 7 | Uncultured <i>Acidobacteria</i> clone 23S rDNA (DQ139446.1)         | $3 \times 10^{-45}$  | 78 | <i>Acidobacteria</i>  |
|       |                        |   | <i>Symbiobacterium thermophilum</i> IAM 14836 23S rDNA (AP006840.1) | $1 \times 10^{-42}$  | 77 | <i>Firmicutes</i>     |
| 20833 | 249                    | 2 | Uncultured bacterium clone 16S rDNA (AY741703.1)                    | $3 \times 10^{-119}$ | 98 | Unclassified          |
|       |                        |   | <i>Chlorobi</i> bacterium str. Mat9-16 16S rDNA (AB478415.1)        | $4 \times 10^{-99}$  | 92 | <i>Chlorobi</i>       |
| 20858 | 102 (283) <sup>†</sup> | 2 | Uncultured bacterium clone 16S rDNA (FM206266.1)                    | $4 \times 10^{-37}$  | 96 | Unclassified          |
|       |                        |   | <i>Anaeromyxobacter dehalogenans</i> 2CP-1 16S rDNA (CP001359.1)    | $7 \times 10^{-34}$  | 94 | <i>Proteobacteria</i> |

|                                                            |                           |      |                                                                                                                                     |                                        |       |                                                |
|------------------------------------------------------------|---------------------------|------|-------------------------------------------------------------------------------------------------------------------------------------|----------------------------------------|-------|------------------------------------------------|
| 20939                                                      | 297                       | 3    | Uncultured bacterium clone 23S rDNA (AY705482.1)                                                                                    | $2 \times 10^{-103}$                   | 89    | Unclassified                                   |
|                                                            |                           |      | <i>Solibacter usitatus</i> Ellin6067 23S rDNA (CP000473.1)                                                                          | $3 \times 10^{-76}$                    | 82    | <i>Acidobacteria</i>                           |
| 26016                                                      | 180                       | 7    | Uncultured bacterium clone 16S rDNA (EF522841.1)                                                                                    | $7 \times 10^{-82}$                    | 98    | Unclassified                                   |
|                                                            |                           |      | <i>Chrysiogenes arsenatis</i> BAL-1 16S rDNA (X81319.1)                                                                             | $7 \times 10^{-63}$                    | 90    | <i>Chrysiogenetes</i>                          |
| 26218                                                      | 341                       | 4    | Uncultured <i>Acidobacteria</i> clone 16S rDNA (AM936563.1)                                                                         | $4 \times 10^{-146}$                   | 94    | <i>Acidobacteria</i>                           |
|                                                            |                           |      | <i>Holophaga foetida</i> 16S rDNA (X77215.1)                                                                                        | $2 \times 10^{-91}$                    | 88    | <i>Acidobacteria</i>                           |
| 26241                                                      | 112                       | 7    | Uncultured <i>Acidobacteria</i> clone 16S rDNA (AM935977.1)                                                                         | $3 \times 10^{-38}$                    | 93    | <i>Acidobacteria</i>                           |
|                                                            |                           |      | Gamma proteobacterium MH179 16S rDNA (EU052733.1)                                                                                   | $1 \times 10^{-36}$                    | 92    | <i>Proteobacteria</i>                          |
| 26319                                                      | 62/145 (548) <sup>†</sup> | 7    | Uncultured bacterium clone 16S rDNA (EU795193.1)/ <i>Mycoplasma genitalium</i> ATCC 33530 23S rDNA (AY816341.1)                     | $2 \times 10^{-18}/ 1 \times 10^{-27}$ | 96/85 | Unclassified/<br><i>Tenericutes</i>            |
|                                                            |                           |      | <i>Methylobacterium radiotolerans</i> JCM 2831 16S rDNA (CP001001.1)/ <i>Mycoplasma genitalium</i> ATCC 33530 23S rDNA (AY816341.1) | $2 \times 10^{-18}/ 1 \times 10^{-27}$ | 96/85 | <i>Proteobacterial</i> /<br><i>Tenericutes</i> |
| 26321                                                      | 131                       | 2    | Uncultured bacterium clone 16S rDNA (AJ296615.1)                                                                                    | $7 \times 10^{-48}$                    | 94    | Unclassified                                   |
|                                                            |                           |      | <i>Rhizobium</i> sp. 29953 16S rDNA (AB456645)                                                                                      | $3 \times 10^{-33}$                    | 87    | <i>Proteobacteria</i>                          |
| 00003                                                      | 24667                     | 1949 |                                                                                                                                     |                                        |       |                                                |
| 00151                                                      | 32435                     | 2412 |                                                                                                                                     |                                        |       |                                                |
| 26131                                                      | 1841                      | 164  |                                                                                                                                     |                                        |       |                                                |
| 26320                                                      | 175                       | 30   |                                                                                                                                     |                                        |       |                                                |
| <i>M. oxyfera</i> 16S and 23S rRNA gene-containing contigs |                           |      |                                                                                                                                     |                                        |       |                                                |

\*For each sequence the best overall BLASTn match and the best cultured organism BLASTn match are listed. †Contig only partially consists of rDNA sequence. ‡Contig contains both 16S rDNA and 23S rDNA sequence.

**Supplementary Table 3** | Number of metaproteomic peptides obtained from culture "Ooij" that could be mapped to potential consensus genomes of *M. oxyfera* "Ooij" assembled with different algorithms for short read mapping. The optimum assembly was achieved with 7 or more iterations of Blast with word length 8, as this assembly led to the highest number of peptides identified.

| Iteration | Reference<br>"Twente" | peptides mapped |                  |                     |                      |     |
|-----------|-----------------------|-----------------|------------------|---------------------|----------------------|-----|
|           |                       | Blast<br>(WL 8) | Blast<br>(WL 12) | MegaBlast<br>(WL 8) | MegaBlast<br>(WL 12) | Maq |
| 1         | 1959                  | 2516            | 2210             | 2506                | 2210                 | 634 |
| 2         |                       | 2975            | 2669             |                     | 2665                 | 680 |
| 3         |                       | 3124            | 2863             |                     | 2855                 | 739 |
| 4         |                       | 3188            | 2964             |                     | 2949                 | 794 |
| 5         |                       | 3213            | 3014             |                     | 2996                 | 833 |
| 6         |                       | 3226            | 3037             |                     | 3017                 | 871 |
| 7         |                       | 3229            | 3044             |                     | 3027                 | 889 |
| 8         |                       | 3229            | 3042             |                     | 3027                 | 906 |
| 9         |                       | 3228            | 3044             |                     | 3029                 | 925 |
| 10        |                       | 3229            | 3047             |                     | 3031                 | 934 |
| 11        |                       | 3229            | 3047             |                     | 3033                 | 934 |
| 12        |                       |                 | 3048             |                     | 3032                 | 945 |

(WL = word length)

Supplementary Table 4 | Genes encoding denitrification enzymes from *M. oxyfera*.

| Enzyme                              | Gene                        | Best BLASTP hit NCBI<br>(BLASTP search against <i>Paracoccus denitrificans</i> between brackets) |                 |                                                 |                                                                 | Transcript<br>-ome<br>coverage | No. of<br>peptides<br>detected | ORF<br>identifier | Enrichment culture<br>"Ooij" sequences |                                |
|-------------------------------------|-----------------------------|--------------------------------------------------------------------------------------------------|-----------------|-------------------------------------------------|-----------------------------------------------------------------|--------------------------------|--------------------------------|-------------------|----------------------------------------|--------------------------------|
|                                     |                             | %<br>Identity                                                                                    | %<br>Similarity | Expected (E)-value                              | GenBank identifier                                              |                                |                                |                   | Average<br>coverage/<br>% identity     | no. of<br>peptides<br>detected |
| Nitrate<br>reductase                | narG                        | 67 (46)                                                                                          | 80 (62)         | 0.0<br>(0.0)                                    | EAR23355 <i>Nitrococcus mobilis</i> Nb-231 (Pden_4236)          | 2                              | ND                             | DAMO_0778         | 34.9/96.8                              | 14                             |
|                                     | narH                        | 65 (50)                                                                                          | 80 (66)         | 0.0<br>( $4 \times 10^{-126}$ )                 | EAR23356 <i>Nitrococcus mobilis</i> Nb-231 (Pden_4235)          | 1                              | ND                             | DAMO_0776         | 34.7/97.5                              | ND                             |
|                                     | narI                        | 57 (38)                                                                                          | 71 (56)         | $8 \times 10^{-64}$<br>( $3 \times 10^{-27}$ )  | Nwi_0778 <i>Nitrobacter winogradski</i> Nb-255 (Pden_4233)      | 1                              | ND                             | DAMO_0774         | 37.3/99.1                              | ND                             |
|                                     | narJ                        | 35 (31)                                                                                          | 52 (43)         | $1 \times 10^{-18}$<br>(0.002)                  | EAR23357 <i>Nitrococcus mobilis</i> Nb-231 (Pden_4234)          | 1                              | ND                             | DAMO_0775         | 41.3/99.3                              | ND                             |
|                                     | narX                        | Not present in <i>M. oxyfera</i> *                                                               |                 |                                                 |                                                                 |                                |                                |                   |                                        |                                |
| Periplasmic<br>nitrate<br>reductase | napA                        | 55 (51)                                                                                          | 72 (63)         | 0.0<br>(0.0)                                    | Glov_1056 <i>Geobacter lovleyi</i> SZ (Pden_4721)               | 1                              | 11                             | DAMO_2411         | 33.9/88.2                              | 23                             |
|                                     | napB                        | 44 (26)                                                                                          | 55 (36)         | $7 \times 10^{-6}$<br>(1.2)                     | EDO26469 <i>Nematostella vectensis</i> (Pden_4722)              | 1                              | ND                             | DAMO_2410         | 29.9/89.0                              | ND                             |
|                                     | napD                        | Not present in <i>M. oxyfera</i>                                                                 |                 |                                                 |                                                                 |                                |                                |                   |                                        |                                |
|                                     | napE                        | Not present in <i>M. oxyfera</i>                                                                 |                 |                                                 |                                                                 |                                |                                |                   |                                        |                                |
| Nitrite<br>reductase                | napC                        | Not present in <i>M. oxyfera</i>                                                                 |                 |                                                 |                                                                 |                                |                                |                   |                                        |                                |
|                                     | nirS                        | 58 (54)                                                                                          | 72 (70)         | 0.0<br>( $8 \times 10^{-158}$ )                 | Rcas_3430 <i>Roseiflexus castenholzii</i> DSM 13941 (Pden_2487) | 18                             | 96                             | DAMO_2415         | 35.0/90.8                              | 192                            |
|                                     | nirJ                        | 46 (48)                                                                                          | 69 (63)         | $4 \times 10^{-111}$<br>( $4 \times 10^{-90}$ ) | MA3035 <i>Methanosarcina acetivorans</i> C2A (Pden_2494)        | 2                              | ND                             | DAMO_2413         | 25.0/88.0                              | ND                             |
|                                     | nirF                        | 45 (37)                                                                                          | 64 (59)         | $5 \times 10^{-95}$<br>( $2 \times 10^{-74}$ )  | EDN67735 <i>Beggiatoa</i> sp. PS (Pden_2490)                    | 1                              | 19                             | DAMO_2412         | 27.2/88.7                              | 29                             |
|                                     | fused<br>nirD/G &<br>nirH/L | 46 (29)                                                                                          | 64 (46)         | $5 \times 10^{-87}$<br>( $5 \times 10^{-29}$ )  | Rxyl_0505 <i>Rubrobacter xylanophilus</i> DSM 9941 (Pden_2491)  | 1                              | ND                             | DAMO_2409         | 15.4/88.7                              | ND                             |
| Nitric oxide<br>reductase           | norZ1                       | 65 (29)                                                                                          | 77 (47)         | 0.0<br>( $5 \times 10^{-24}$ )                  | Gmet_3493 <i>Geobacter metallireducens</i> GS-15 (Pden_2483)    | 1                              | ND                             | DAMO_1889         | 34.1/94.0                              | ND                             |
|                                     | norZ2                       | 34 (26)                                                                                          | 52 (46)         | $2 \times 10^{-121}$<br>( $6 \times 10^{-29}$ ) | Gmet_3493 <i>Geobacter metallireducens</i> GS-15 (Pden_2483)    | 78                             | ND                             | DAMO_2434         | 42.1/91.2                              | 7                              |
|                                     | norZ3                       | 34 (26)                                                                                          | 53 (46)         | $4 \times 10^{-121}$<br>( $2 \times 10^{-27}$ ) | Gmet_3493 <i>Geobacter metallireducens</i> GS-15 (Pden_2483)    | 352                            | 4                              | DAMO_2437         | 53.5/91.7                              | 67                             |
|                                     | norB<br>norC                | Not present in <i>M. oxyfera</i>                                                                 |                 |                                                 |                                                                 |                                |                                |                   |                                        |                                |
| Nitrous oxide<br>reductase          | nosZ                        | Not present in <i>M. oxyfera</i>                                                                 |                 |                                                 |                                                                 |                                |                                |                   |                                        |                                |
|                                     | nosD                        | Not present in <i>M. oxyfera</i>                                                                 |                 |                                                 |                                                                 |                                |                                |                   |                                        |                                |
|                                     | nosF                        | Not present in <i>M. oxyfera</i>                                                                 |                 |                                                 |                                                                 |                                |                                |                   |                                        |                                |
|                                     | nosY                        | Not present in <i>M. oxyfera</i>                                                                 |                 |                                                 |                                                                 |                                |                                |                   |                                        |                                |
|                                     | nosL                        | 50 (23)                                                                                          | 69 (44)         | $6 \times 10^{-43}$<br>( $7 \times 10^{-4}$ )   | Gsu1258 <i>Geobacter sulfurreducens</i> PCA (Pden_4215)         | 0                              | ND                             | DAMO_1959         | 17.6/88.9                              | ND                             |
|                                     |                             |                                                                                                  |                 |                                                 |                                                                 |                                |                                |                   |                                        |                                |

Genes encoding denitrification enzymes were identified by BLASTP search of translated ORFs against the NCBI NR database. Similarity to *P. denitrificans* homologs was determined by BLASTP search at the Genome Project of *P. denitrificans* within NCBI. \*In the *M. oxyfera* nar operon, which is organized like that of *N. winogradski*, a different gene with no sequence similarity is present at the position of narX; its best BLASTP hit is to kusc0320 (*Candidatus* Kueneria stuttgartiensis, unknown protein). ND, not detected.

Supplementary Table 5 | Genes encoding selected carbon metabolism enzymes from *M. oxyfera*.

| Enzyme                 | Gene  | Best BLASTP hit NCBI<br>(BLASTP against <i>Methylococcus capsulatus</i> between brackets) |                 |                                                 |                                                              | Transcript<br>-ome<br>coverage | No. of<br>peptides<br>detected | ORF<br>identifier | Enrichment culture<br>"Ooij" sequences |                                |
|------------------------|-------|-------------------------------------------------------------------------------------------|-----------------|-------------------------------------------------|--------------------------------------------------------------|--------------------------------|--------------------------------|-------------------|----------------------------------------|--------------------------------|
|                        |       | %<br>Identity                                                                             | %<br>Similarity | Expected (E)-value                              | GenBank identifier                                           |                                |                                |                   | Average<br>coverage/<br>% identity     | no. of<br>peptides<br>detected |
| Methane monooxygenase  | pmoA1 | = (53)                                                                                    | = (73)          | =<br>( $1 \times 10^{-76}$ )                    | = (mca2854)                                                  | 45                             | 1                              | DAMO_2450         | 35.3/<br>89.9                          | 38                             |
|                        | pmoB1 | = (40)                                                                                    | = (60)          | =<br>( $1 \times 10^{-84}$ )                    | = (mca2853)                                                  | 55                             | 8                              | DAMO_2448         | 34.0/<br>88.4                          | 74                             |
|                        | pmoC1 | 53 (59)                                                                                   | 68 (75)         | $3 \times 10^{-73}$<br>( $3 \times 10^{-71}$ )  | CAE48351 <i>Methylocystis</i> sp. SC2 (mca2855)              |                                |                                | DAMO_2451         | 63.7/<br>90.8                          | 30                             |
|                        | pmoC2 | 53 (59)                                                                                   | 68 (75)         | $3 \times 10^{-73}$<br>( $3 \times 10^{-71}$ )  | CAE48351 <i>Methylocystis</i> sp. SC2 (mca2855)              | 36                             | 3                              | DAMO_2339         |                                        |                                |
|                        | mmoX  | Not present in <i>M. oxyfera</i>                                                          |                 |                                                 |                                                              |                                |                                |                   |                                        |                                |
| Methanol dehydrogenase | mxaf1 | = (74)                                                                                    | = (88)          | =<br>(0.0)                                      | = (mca0779)                                                  | 62                             | 69                             | DAMO_0112         | 2.4/<br>89.7                           | ND                             |
|                        | mxaf2 | 68 (40)                                                                                   | 80 (59)         | 0.0<br>( $3 \times 10^{-126}$ )                 | Msil_3149 <i>Methylocella silvestris</i> BL2 (mca0779)       | 14                             | 108                            | DAMO_0124         | 2.4/<br>88.6                           | ND                             |
|                        | mxaf3 | 62 (49)                                                                                   | 74 (63)         | 0.0<br>( $3 \times 10^{-154}$ )                 | Minf_0992<br><i>Methylacidiphilum inferorum</i> V4 (mca0299) | 6                              | 38                             | DAMO_0134         | 22.3/<br>88.5                          | 145                            |
|                        | mxaj1 | 54 (61)                                                                                   | 72 (76)         | $2 \times 10^{-84}$<br>( $3 \times 10^{-60}$ )  | ABE77337<br><i>Methylomicrobium</i> sp. HG-1 (mca0780)       | 29                             | 5                              | DAMO_0113         | 1.9/<br>89.3                           | ND                             |
|                        | mxaj2 | 46 (29)                                                                                   | 62 (52)         | $2 \times 10^{-118}$<br>( $7 \times 10^{-30}$ ) | Msil_3148 <i>Methylocella silvestris</i> BL2 (mca0300)       | 8                              | ND                             | DAMO_0125         | 3.2/<br>89.9                           | ND                             |
|                        |       |                                                                                           |                 |                                                 |                                                              |                                |                                |                   |                                        |                                |

|                                                                                   |         |                                  |         |                                                  |                                                                             |     |         |                         |               |    |
|-----------------------------------------------------------------------------------|---------|----------------------------------|---------|--------------------------------------------------|-----------------------------------------------------------------------------|-----|---------|-------------------------|---------------|----|
|                                                                                   | mxaj3   | 50 (35)                          | 67 (53) | $4 \times 10^{-76}$<br>( $8 \times 10^{-39}$ )   | AAy96668 uncultured bacterium BAC10-4 (mca0300)                             | 3   | ND      | DAMO_0136               | 23.9/<br>87.3 | 5  |
|                                                                                   | mxag1   | 59 (52)                          | 67 (66) | $5 \times 10^{-49}$<br>( $6 \times 10^{-43}$ )   | Veis_1827<br><i>Verminephrobacter eiseniae</i> EF01-2 (mca0781)             | 16  | 3       | DAMO_0114               | 1.3/<br>88.6  | ND |
|                                                                                   | mxag2   | 50 (35)                          | 68 (53) | $1 \times 10^{-20}$<br>( $2 \times 10^{-7}$ )    | Msil_3147 <i>Methylocella silvestris</i> BL2 (mca0781)                      | 6   | 2       | DAMO_0127               | 2.7/<br>89.3  | ND |
|                                                                                   | mxag3   | 43 (28)                          | 56 (41) | $5 \times 10^{-18}$<br>( $4 \times 10^{-9}$ )    | AAy96667 uncultured bacterium BAC10-4 (mca0781)                             | 5   | 6       | DAMO_0138               | 30.6/<br>87.2 | 13 |
|                                                                                   | mxal    | 62 (63)                          | 80 (78) | $4 \times 10^{-25}$<br>( $4 \times 10^{-22}$ )   | ACB32199 uncultured bacterium 16A2 (mca0782)                                | 27  | ND      | DAMO_0115               | 0.8/<br>88.2  | ND |
|                                                                                   | mxar    | 62 (62)                          | 80 (82) | $4 \times 10^{-125}$<br>( $5 \times 10^{-128}$ ) | Mfia_1895 <i>Methylobacillus flagellatus</i> KT (mca1525)                   | 5   | ND      | DAMO_0116               | 1.7/<br>89.1  | ND |
|                                                                                   | mxas    | 44 (45)                          | 58 (56) | $1 \times 10^{-60}$<br>( $4 \times 10^{-56}$ )   | Mfia_1896 <i>Methylobacillus flagellatus</i> KT (mca0784)                   | 2   | ND      | DAMO_0117               | 1.8/<br>89.9  | ND |
|                                                                                   | mxaa    | = (33)                           | = (48)  | =<br>( $7 \times 10^{-31}$ )                     | = (mca0785)                                                                 | 1   | ND      | DAMO_0118               | 2.4/<br>89.4  | ND |
|                                                                                   | mxac    | 43 (46)                          | 63 (60) | $1 \times 10^{-67}$<br>( $3 \times 10^{-59}$ )   | MDMS009_1430<br><i>Methylophaga</i> sp DMS010 (mca1528)                     | 1   | ND      | DAMO_0119               | 1.8/<br>88.1  | ND |
|                                                                                   | mxak    | 37 (31)                          | 52 (48) | $2 \times 10^{-16}$<br>( $3 \times 10^{-13}$ )   | Mfia_2036 <i>Methylobacillus flagellatus</i> KT (mca1529)                   | 1   | ND      | DAMO_0120               | 3.2/<br>89.6  | ND |
|                                                                                   | mxal    | 41 (44)                          | 58 (56) | $2 \times 10^{-50}$<br>( $1 \times 10^{-40}$ )   | Mfia_2035 <i>Methylobacillus flagellatus</i> KT (mca1530)                   | 1   | 2       | DAMO_0121 <sup>†</sup>  | 1.4/<br>89.4  | ND |
|                                                                                   | mxad    | 53 (47)                          | 65 (65) | $2 \times 10^{-40}$<br>( $9 \times 10^{-41}$ )   | ABS82778 uncultured <i>Methylophaga</i> sp. (mca0789)                       | 1   | 2       | DAMO_0121 <sup>†</sup>  | 1.4/<br>89.4  | ND |
|                                                                                   | mxae1   | 42 (-)                           | 66 (-)  | $4 \times 10^{-75}$<br>(-)                       | MDMS009_1396<br><i>Methylophaga</i> sp DMS010 (-)                           | 1   | ND      | DAMO_0122               | 2.8/<br>89.1  | ND |
|                                                                                   | mxae2   | 44 (-)                           | 63 (-)  | $8 \times 10^{-67}$<br>(-)                       | AAy96670 uncultured bacterium BAC10-4 (-)                                   | 4   | 2       | DAMO_0128               | 3.1/<br>90.0  | ND |
| Formaldehyde dehydrogenase                                                        | adhP    | Not present in <i>M. oxyfera</i> |         |                                                  |                                                                             |     |         |                         |               |    |
| Formaldehyde activating enzyme                                                    | fae     | 70 (57)                          | 80 (72) | $7 \times 10^{-60}$<br>( $2 \times 10^{-37}$ )   | EDL60092 <i>Planctomyces maris</i> DSM 8797 (mca2866)                       | 19  | 13      | DAMO_0454               | 44.6/<br>95.2 | 44 |
| Methylene H <sub>4</sub> MPT dehydrogenase                                        | mtdB    | 40 (42)                          | 55 (58) | $5 \times 10^{-46}$<br>( $1 \times 10^{-45}$ )   | Bphy_6482 <i>Burkholderia phymatum</i> STM815 (mca3019)                     | 4   | 3       | DAMO_0455               | 32.3/<br>93.6 | 40 |
| Methenyl H <sub>4</sub> MPT cyclohydrolase                                        | mch     | 53 (37)                          | 68 (57) | $5 \times 10^{-84}$<br>( $3 \times 10^{-60}$ )   | AAy96682 uncultured bacterium BAC10-4 (mca2863)                             | 3   | 18      | DAMO_0461               | 21.1/<br>87.5 | 19 |
| Formyltransferase/hydrolase complex                                               | fhcA    | 55 (48)                          | 70 (65) | $6 \times 10^{-162}$<br>( $8 \times 10^{-145}$ ) | AAy96680 uncultured bacterium BAC10-4 (mca2859)                             | 5   | 2       | DAMO_0458               | 39.3/<br>93.6 | 39 |
|                                                                                   | fhcB1   | 47 (25)                          | 65 (44) | $6 \times 10^{-119}$<br>( $5 \times 10^{-30}$ )  | MK0259 <i>Methanopyrus kandleri</i> AV19 (mca2860)                          | 4   | 4       | DAMO_0457               | 39.6/<br>92.0 | 40 |
|                                                                                   | fhcB2   | 46 (25)                          | 63 (45) | $4 \times 10^{-108}$<br>( $3 \times 10^{-29}$ )  | AAy96679 uncultured bacterium BAC10-4 (mca2860)                             | 0/0 | ND      | DAMO_1135/<br>DAMO_1136 | 33.7/<br>97.1 | ND |
|                                                                                   | fhcC    | 50 (34)                          | 66 (56) | $2 \times 10^{-88}$<br>( $7 \times 10^{-38}$ )   | AAy96681 uncultured bacterium BAC10-4 (mca2857)                             | 5   | ND      | DAMO_0460               | 36.0/<br>90.8 | 5  |
|                                                                                   | fhcD    | = (55)                           | = (71)  | =<br>( $5 \times 10^{-81}$ )                     | = (mca2858)                                                                 | 4   | ND      | DAMO_0459               | 35.1/<br>91.6 | 34 |
| Methylene H <sub>4</sub> F dehydrogenase/Methenyl H <sub>4</sub> F cyclohydrolase | foiD    | 58 (-)                           | 74 (-)  | $1 \times 10^{-87}$<br>(-)                       | Moth_1516 <i>Moorella thermoacetica</i> ATCC 39073 (-)                      | 1   | ND      | DAMO_1852               | 31.2/<br>88.4 | ND |
| 5-formyl H <sub>4</sub> F cycloligase                                             | mthfs   | Not present in <i>M. oxyfera</i> |         |                                                  |                                                                             |     |         |                         |               |    |
| Formate H <sub>4</sub> F ligase                                                   | fhs     | Not present in <i>M. oxyfera</i> |         |                                                  |                                                                             |     |         |                         |               |    |
| Formyl H <sub>4</sub> F deformylase                                               | purU    | 64 (-)                           | 80 (-)  | $3 \times 10^{-106}$<br>(-)                      | EDT34736 <i>Geobacillus</i> sp. WCH70 (-)                                   | 1   | ND      | DAMO_2586               | 36.3/<br>91.1 | ND |
| Formate dehydrogenase                                                             | fdhA1   | 57 (40)                          | 72 (56) | 0.0<br>(0.0)                                     | EEG07387 <i>Lutiella nitroferum</i> 2002 (mca1391)                          | 0   | 2       | DAMO_1138               | 2.3/<br>89.4  | ND |
|                                                                                   | fdhA2   | 43 (40)                          | 62 (56) | 0.0<br>(0.0)                                     | Nither_0100 <i>Natranaerobius thermophilus</i> JW/NM-WN-LF (mca2576)        | 1   | 27      | DAMO_0853               | 26.8/<br>90.3 | 19 |
|                                                                                   | fdhB1   | 54 (43)                          | 68 (59) | $5 \times 10^{-125}$<br>( $1 \times 10^{-67}$ )  | ACD29487 <i>Ralstonia pickettii</i> 12J (mca1392)                           | 0   | 2       | DAMO_1137               | 3.2/<br>87.6  | ND |
|                                                                                   | fdhB/C2 | 40 (36)                          | 59 (54) | $2 \times 10^{-107}$<br>( $2 \times 10^{-79}$ )  | Csac_0620<br><i>Caldicellulosiruptor saccharolyticus</i> DSM 8903 (mca1392) | 1   | 29.4/30 | DAMO_0854               | 21.3/<br>89.7 | 5  |
|                                                                                   | fdhD    | Not present in <i>M. oxyfera</i> |         |                                                  |                                                                             |     |         |                         |               |    |
| Serine glyoxylate aminotransferase                                                | sga     | 53 (34)                          | 71 (53) | $5 \times 10^{-113}$<br>( $7 \times 10^{-53}$ )  | EAY55805 <i>Leptospirillum</i> sp. Group II UBA (mca1406)                   | 3   | 13      | DAMO_3099               | 27.1/<br>88.1 | 10 |
| Hydroxypyruvate dehydrogenase                                                     | hprA    | Not present in <i>M. oxyfera</i> |         |                                                  |                                                                             |     |         |                         |               |    |
| Serine hydroxymethyltransferase                                                   | glyA    | 68 (56)                          | 80 (71) | $7 \times 10^{-170}$<br>( $4 \times 10^{-119}$ ) | SYN_02367 <i>Syntrophus aciditrophicus</i> SB (mca1660)                     | 3   | 18      | DAMO_1077               | 28.4/<br>89.7 | 8  |
| Glycerate kinase                                                                  | gckA    | Not present in <i>M. oxyfera</i> |         |                                                  |                                                                             |     |         |                         |               |    |
| Phosphoenolpyruvate carboxylase                                                   | ppc     | 54 (-)                           | 70 (-)  | $1 \times 10^{-151}$<br>(-)                      | Daud_0773 <i>Candidatus "Desulfuridis audaxviator"</i> MP104C (-)           | 0   | ND      | DAMO_2168               | 33.0/<br>97.5 | 12 |
| Malyl-CoA lyase                                                                   | mcl     | Not present in <i>M. oxyfera</i> |         |                                                  |                                                                             |     |         |                         |               |    |

|                                                                  |          |                                  |         |                                                 |                                                                 |   |    |           |               |    |
|------------------------------------------------------------------|----------|----------------------------------|---------|-------------------------------------------------|-----------------------------------------------------------------|---|----|-----------|---------------|----|
| Hexulose-6-phosphate synthase                                    | hspA     | Not present in <i>M. oxyfera</i> |         |                                                 |                                                                 |   |    |           |               |    |
| Hexulose-6-phosphate isomerase                                   | sbgU     | Not present in <i>M. oxyfera</i> |         |                                                 |                                                                 |   |    |           |               |    |
| Ribulose bisphosphate carboxylase                                | cbbL     | 83 (58)                          | 91 (72) | 0.0<br>( $1 \times 10^{-147}$ )                 | RC1_4061 <i>Rhodospirillum centenum</i> SW (mca2743)            | 1 | 12 | DAMO_2165 | 35.1/<br>97.5 | 47 |
|                                                                  | cbbS     | 68 (33)                          | 86 (63) | $2 \times 10^{-54}$<br>( $5 \times 10^{-15}$ )  | Q09125 <i>Porphyridium aeruginum</i> (mca2744)                  | 2 | 4  | DAMO_2166 | 39.9/<br>99.3 | 5  |
| Phosphoribulosekinase                                            | cbbP1    | 67 (55)                          | 78 (69) | $9 \times 10^{-112}$<br>( $5 \times 10^{-93}$ ) | Tbd_2447 <i>Thiobacillus denitrificans</i> ATCC 25259 (mca3051) | 1 | 3  | DAMO_2116 | 12.9/<br>93.4 | ND |
|                                                                  | cbbP2    | 42 (34)                          | 59 (45) | $2 \times 10^{-67}$<br>( $9 \times 10^{-5}$ )   | Minf_1261<br><i>Methylacidiphilum inferorum</i> V4 (mca3051)    | 3 | ND | DAMO_2653 | 39.4/<br>88.1 | 4  |
| Fructose 1,6-bisphosphatase/<br>Sedoheptulose 1,7-bisphosphatase | cbbF-I   | 49 (-)                           | 67 (-)  | $2 \times 10^{-91}$<br>(-)                      | gvip434 <i>Gloeobacter violaceus</i> PCC 7421 (-)               | 1 | 5  | DAMO_2163 | 28.3/<br>89.4 | 2  |
|                                                                  | cbbF-II1 | 58 (-)                           | 78 (-)  | $4 \times 10^{-103}$<br>(-)                     | Rcas_1213 <i>Roseiflexus castenholzii</i> DSM 13941 (-)         | 2 | 17 | DAMO_2650 | 29.7/<br>90.7 | 10 |
|                                                                  | cbbF-II2 | 58 (-)                           | 76 (-)  | $1 \times 10^{-102}$<br>(-)                     | MXAN_4455 <i>Myxococcus xanthus</i> DK 1622 (-)                 | 2 | 3  | DAMO_2986 | 34.7/<br>89.5 | ND |
|                                                                  | cbbF-II3 | 58 (-)                           | 75 (-)  | $1 \times 10^{-104}$<br>(-)                     | EEB33574 <i>Desulfovibrio piger</i> ATCC 29098 (-)              | 3 | 22 | DAMO_0174 | 23.7/<br>89.6 | 2  |

Genes encoding enzymes of carbon metabolism were identified by BLASTP search of translated ORFs against the NCBI NR database. Similarity to *M. capsulatus* was determined by BLASTP search at the Genome Project of *M. capsulatus* within NCBI. = indicates that *M. capsulatus* has the best BLASTP hit. (-) indicates that the gene is not present in *M. capsulatus*. ‡ DAMO\_0121 is a fused ORF of two proteins. ND, not detected.

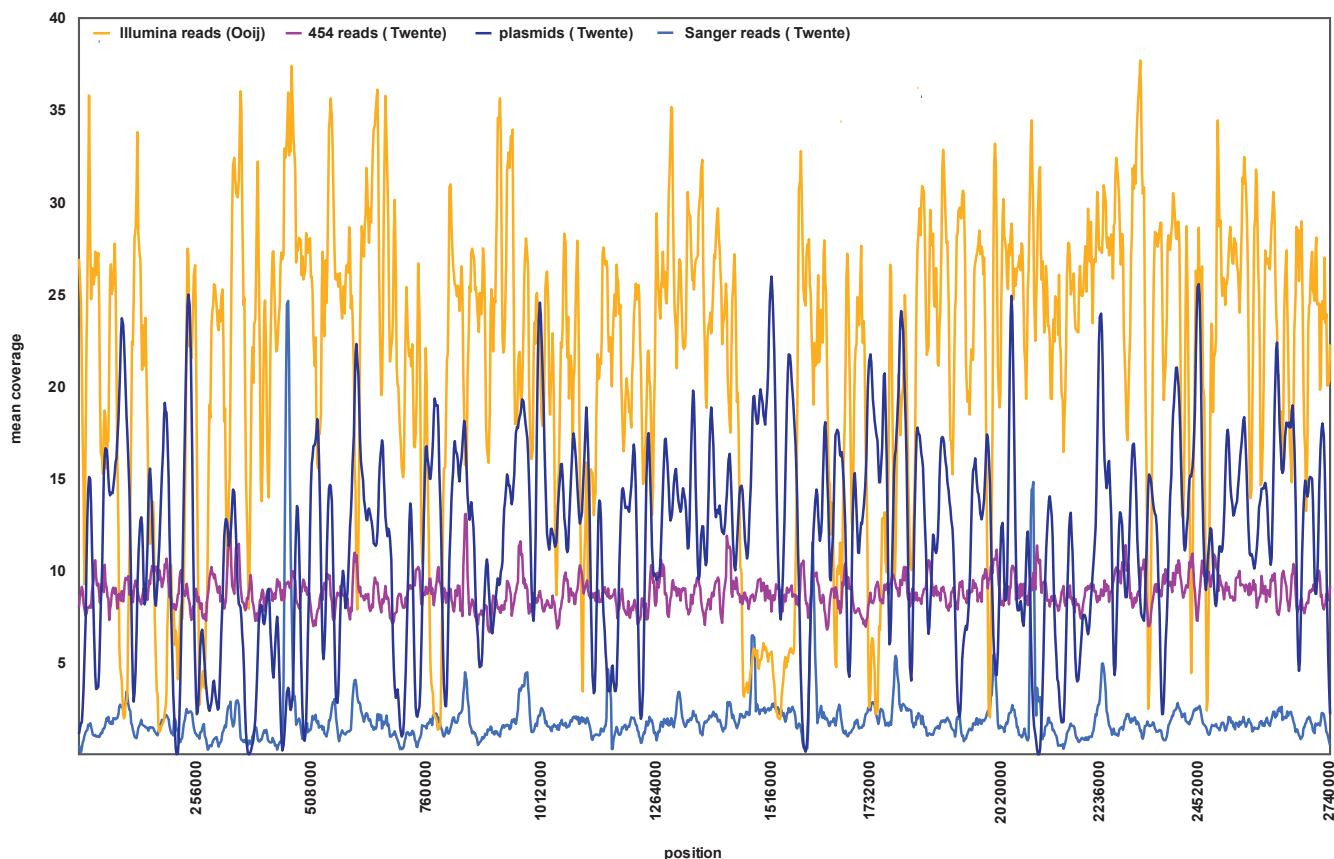

**Supplementary Figure 1** Coverage of the *Methylobacterium oxyfera* genome by different sets of sequences and clones. Sanger (light blue) and 454 pyrosequencing (purple) reads from the "Twente" enrichment culture were compared with the finished *M. oxyfera* genome using the blastn algorithm. Reads mapping uniquely on the genome, with at least 95 percent identity over at least 95 percent of their length were kept. For the plasmid (dark blue) coverage, clones having both their ends mapped with the previously described criteria, and separated by 7 to 13 kb (mean library insert size of 10 kb) were considered as localised on the *M. oxyfera* genome, and taken into account for the coverage computation. Illumina reads from the "Ooij" sample (orange) were mapped as described in the method section. For the visualization, a sliding window of 10 kb with a step size of 2 kb was used.



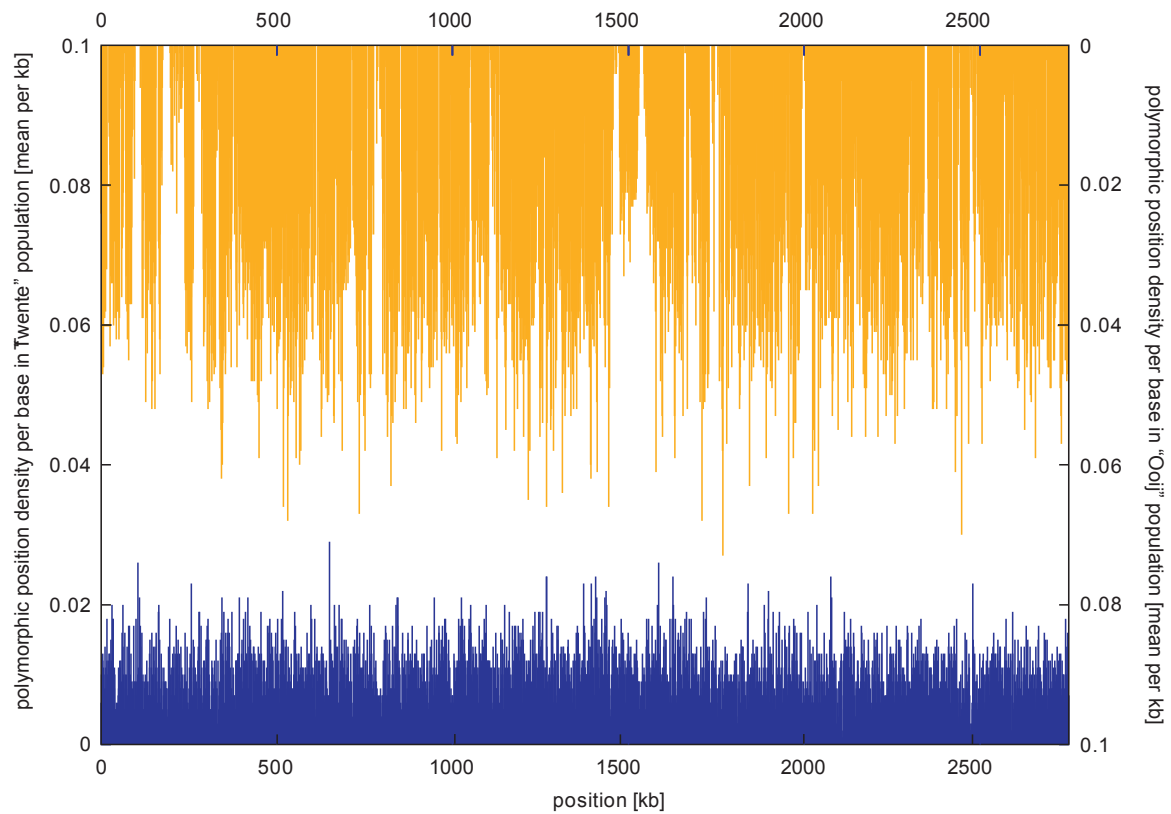

**Supplementary Figure 2** Single nucleotide polymorphism frequency in the two enrichment cultures ("Twente" blue, "Ooij" orange, from top) identified by mapping the DNA Illumina reads to their respective genomes using Maq (default settings). Sites with a polymorphic consensus were called as SNP sites.

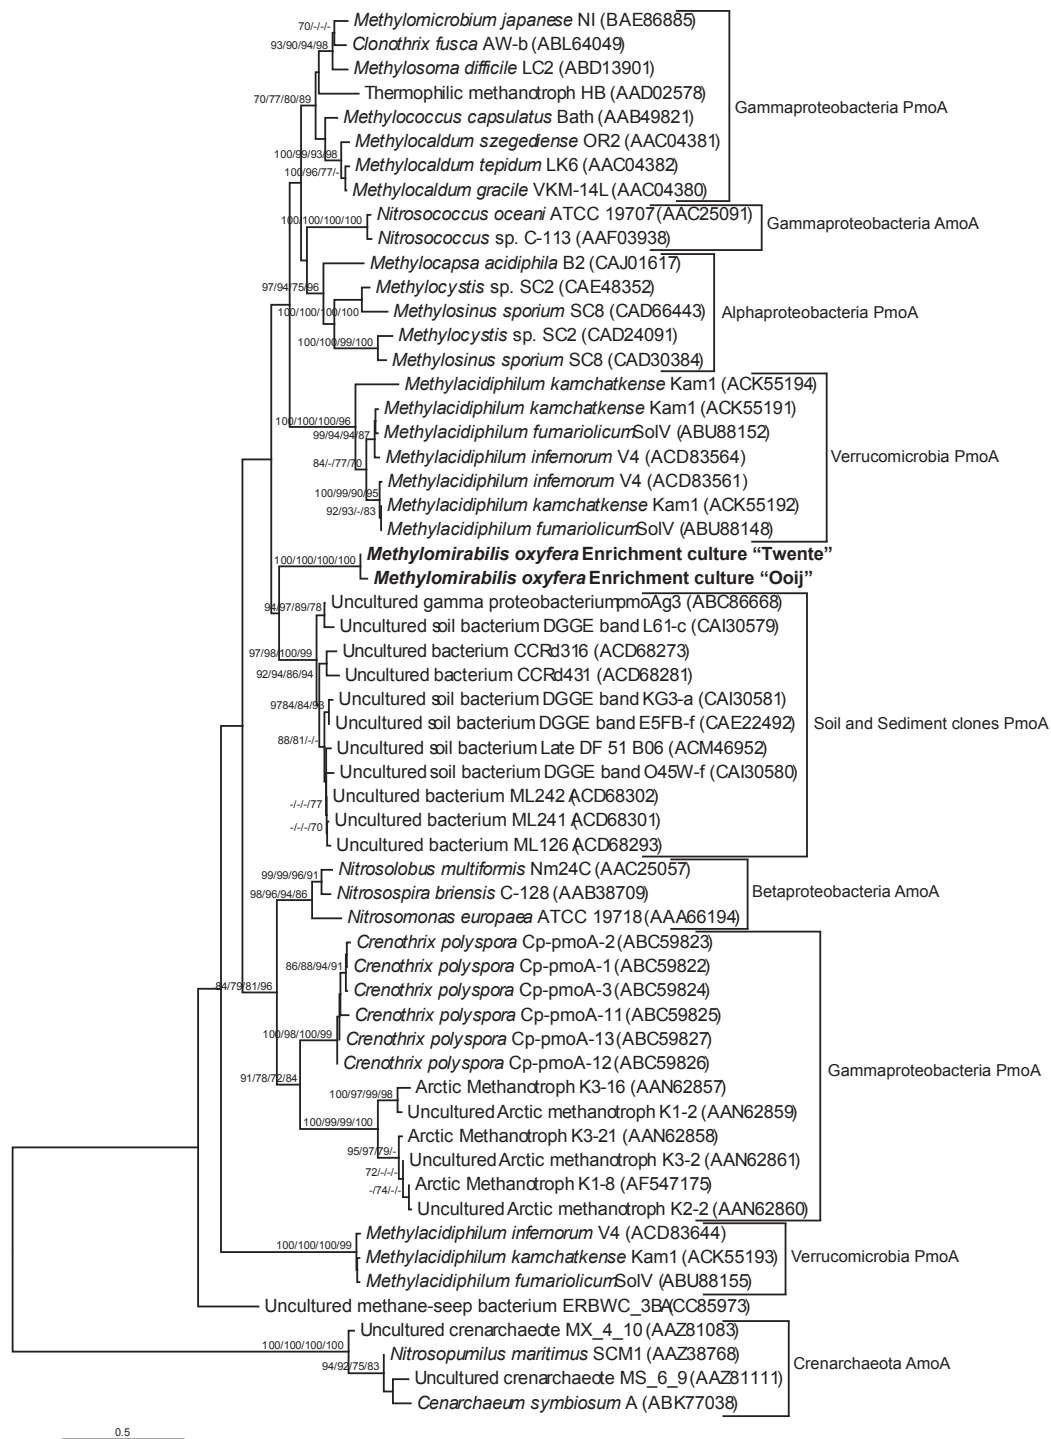

**Supplementary Figure 3** | Phylogenetic relationship among PmoA and AmoA proteins. The distance tree was computed using the Dayhoff matrix method. Bootstrap values (>70%, 100 replicates) calculated within the Neighbor-Joining, Minimum-Evolution, Maximum-Parsimony and Maximum-Likelihood evolutionary methods are shown at branch points from left to right. The scale bar represents 0.5 changes per amino acid.

a

```

ABK77038_Cenarchaeum_symbiosum      : GDYIFYTDWANTSF--TVFSTISQTLMLVVGATYYTFTGVPGTATYYALI
ABY89139_Nitrosopumilus_maritimus    : GDYIFYTDWANTSY--TVFSTISQTLMLVVGATYYTFTGVPGTATYYALI
AAZ81111_Uncultured_crenarchaeote    : GDYIFYTDWANTSY--TVFSTIGNILVSVGATYYLFTGVPGTATYYGLI
AAU92182_Methylococcus_capsulatus    : GDWDFWSDWKDRRLWVTTPVIVLVTTPAAVQSYLWERYRPLPWGATVCVLG
BAE86885_Methylomicrobium_japanese   : GDWDFWTDWKDRRLWVTVAPIVSITTPAAVQAVLWRYRILWAGATLCVLG
AAA87217_Methylomicrobium_album_BG8_pmo1: -----TDWKDRRLWVTVLPVIGITTPAAVQAVVWYRWRPLPGAMLAVLG
ACE95888_Methylomicrobium_album_BG8_pmo2: -----XDKDRQWVPLVTPVIGITTPAAVQAVLWVKFRPLPGATLCVAA
CAE47800_Methylocystis_sp_SC2_pmoA1  : GDWDFWVDWKDRRMWPTVVPVILGVTCAAQAQFVWVNFRLPFGAVFAALG
CAE48352_Methylocystis_sp_SC2_pmoA2  : GDWDFWLDKDRRMWPTVTPVIVMCAAAAQSFVTRFRPLPIGATTVVLA
BAF49660_Methylocaldum_sp_T025       : GDWDFWADWKDRRLWVTTPVIVLITTPAAIQAWAWEKFRNPWGATIAVLA
AAA87220_Methylosinus_trichosporium_OB3b: GDWDFWVDWKDRRMWPTVVPVILGVTAAAAQAFVWENFKLPPGATFVAVSG
CAD24093_Methylosinus_trichosporium_KS21: -----VDWKDRRMWPTVVPVILGVTAAAAQAFVWENFKLPPGATFVVLG
CAD24094_Methylosinus_trichosporium_KS21: -----DRRLWPTVTPVISAICAAAAQAFVWKRFRPLPIGATTVVLA
CAD66447_Methylosinus_trichosporium_SM6: -----RMWPTVAPVIVMCAAAAQVQSFVWOKFRPLPIGATVACLA
CAD30381_Methylosinus_trichosporium_SM6: -----VDWKDRRMWPTVVPVILGVTAAATQAFVWENFKLPPGATFVAVLG
AAB70518_Methylobacter_sp_BB5_1_pmoA1 : GDWDFWTDWKDRRLWVTVAPIVSITTPAAVQAVLWRYRPLPWGAVVCVLG
ACE95886_Methylobacter_sp_BB5_1_pmoA2 : -----VDWKDRQWVPLVTPVIGITTPAAVQAVLWVKFRPLPGATLCVTA
ACE95894_Methylomonas_methanica_S1_pmoA1: GDWDFWTDWKDRRLWVTVAPIVSITTPAAVQAVLWRYRPLPWGATLSVVA
ACE95893_Methylomonas_methanica_S1_pmoA2: -----VDWKDRQWVPLVTPVIGITTPAAVQAVLWVKFRPLPGATLCVAA
AAF08214_Methylomonas_sp_LW13_pmoA1  : GDWDFWTDWKDRRLWVTVAPIVSITTPAAVQAVLWRYRPLPWGATLSVVA
ACE95890_Methylomonas_sp_LW13_pmoA2  : -----VDWKDRQWVPLVTPVIGITTPAAVQAVLWVKFRPLPGATLCVAA
CAJ01617_Methylocapsa_acidiphila     : GDWDFWLDWKDRRFWPTVLPVIVLVTTPAAAQAVFVWESFRLPFGATFVLVVG
ABC59827_Crenothrix_polyspora       : GDWDFWLDWKDRQWVPLVTPVILITTPCAAIQYVWVNYRQPPGATLCILA
ABU88148_M_fumariolicum_solV_pmoA1   : GDWSFWTDWKDRMWPVVPVAPVMDITTPAACQAILWTKFKAPITGATFSCAG
ABU88152_M_fumariolicum_solV_pmoA2   : GDWSFWTDWKDRMWPVVPVAPVADITTPAAVQVILWTKFKMPIGATFCTVG
ABU88155_M_fumariolicum_solV_pmoA3   : GDWSFWTDWKDRRYFPVIGVTSYMLVSVQAAQWIKARLPMGLTLCVAG
ACC85973_ERBWC_3B                   : GDWDFWVDWKDRQYVVTTPVIMMIVAAIQAVFAHFRLPIGATLCGVV
ACD68273_Uncultured_ha_bacterium_CCRd316: GDWDFWTDWKDRRWLVTPVIVLITTPAAIQYLLWVKRPLPGATVCCVVG
ACD68281_Uncultured_haw_bact_CCRd431 : GDWDFWVDWKDRRWLVTPVIVLITTPAAIQYLLWVKRPRVPGATVCCVVG
ACD68293_ML126_uncultured_bacterium  : GDWDFWTDWKDRRFWLVTPVIVLITTPAAIQYVLDWVKRPLPGATVCCVVG
ABA58955_Nitrosococcus_oceani_ATCC_19707: GDWDFWVDWKDRRFWVTVPVIVSVVTPAAAQAFVWVKFRPLPWGATLVTLG
ABI60300_Nitrosomonas_eutropha_C91   : GDWDFWMDWKDRQWVVPVTPVIGITVCSAIMYVWVNYRQPPGATLCVVC
ABB74106_Nitrosospira_multiformis_25196 : GDWDFWLDWKDRQWVVPVTPVIGITVCSAIMYVWVNYRPLPWGATLCIVC
AAB86881_Nitrosospira_sp_NpAV_pmoA1  : GDWDFWLDWKDRQWVVPVTPVIGITVCSAIMYVWVNYRPLPWGATLCIVC
Methylomirabilis_oxyfera_Twente_pmoA : GDWDFWLDWKDRRWVTPVIVLITTPAATQVFMWVKRMLPPIGATFCVMT
Methylomirabilis_oxyfera_Ooij_pmoA   : GDWDFWLDWKDRRWVTPVIVLITTPAATQVFMWVKRMLPPIGATFCVMT

```

```

ABK77038_Cenarchaeum_symbiosum      : MTVVWVIK--GAFALGYPPYDFIATP-IWLPSAMLLDLAYWATKRNKHS
ABY89139_Nitrosopumilus_maritimus    : MTVVWVIK--GAFSLGYPPYDFIVTP-VWLPSAMLLDLVYWATKRNKHS
AAZ81111_Uncultured_crenarchaeote    : MQVWVIK--GAFALGYPPYDFIVTP-MWIPSCMLLDLAYWATKRNKHS
AAU92182_Methylococcus_capsulatus    : LLLGEWINRYNFFGWTYFFPINF-VFPAVSLVPGAILDITVLMMSG-SYLF
BAE86885_Methylomicrobium_japanese   : LLLGEWINRYNFFGWTYFFPINF-VFPSNLMPGAIVLDVILMLSN-SMTL
AAA87217_Methylomicrobium_album_BG8_pmo1: LLLGEWINRYNFFGWTYFFPINF-VFPSQFAPGAIVLDVILMLSN-SMQL
ACE95888_Methylomicrobium_album_BG8_pmo2: LLLGEWINRYNFFGWTYFFPINF-VLPAATMLPGAIVLDAILMLSN-SFTI
CAE47800_Methylocystis_sp_SC2_pmoA1  : LLLGEWINRYNFFGWTYFFPINF-VFPAVSLVPGAILDITVLMMSG-SYLF
CAE48352_Methylocystis_sp_SC2_pmoA2  : LLLGEWINRYNFFGWTYFFPINF-VFPAVSLVPGAILDITVLMMSG-SYLF
BAF49660_Methylocaldum_sp_T025       : LLLGEWINRYNFFGWTYFFPINF-VFPAVSLVPGAILDITVLMMSG-SYLF
AAA87220_Methylosinus_trichosporium_OB3b: LLLGEWINRYNFFGWTYFFPINF-VFPAVSLVPGAILDITVLMMSG-SYLF
CAD24093_Methylosinus_trichosporium_KS21: LLLGEWINRYNFFGWTYFFPINF-VFPAVSLVPGAILDITVLMMSG-SYLF
CAD24094_Methylosinus_trichosporium_KS21: LLLGEWINRYNFFGWTYFFPINF-VFPAVSLVPGAILDITVLMMSG-SYLF
CAD66447_Methylosinus_trichosporium_SM6: LLLGEWINRYNFFGWTYFFPINF-VFPAVSLVPGAILDITVLMMSG-SYLF
CAD30381_Methylosinus_trichosporium_SM6: LLLGEWINRYNFFGWTYFFPINF-VFPAVSLVPGAILDITVLMMSG-SYLF
AAB70518_Methylobacter_sp_BB5_1_pmoA1 : LLLGEWINRYNFFGWTYFFPINF-VFPAVSLVPGAILDITVLMMSG-SYLF
ACE95886_Methylobacter_sp_BB5_1_pmoA2 : LLLGEWINRYNFFGWTYFFPINF-VFPAVSLVPGAILDITVLMMSG-SYLF
ACE95894_Methylomonas_methanica_S1_pmoA1: LLLGEWINRYNFFGWTYFFPINF-VFPAVSLVPGAILDITVLMMSG-SYLF
ACE95893_Methylomonas_methanica_S1_pmoA2: LLLGEWINRYNFFGWTYFFPINF-VFPAVSLVPGAILDITVLMMSG-SYLF
AAF08214_Methylomonas_sp_LW13_pmoA1  : LLLGEWINRYNFFGWTYFFPINF-VFPAVSLVPGAILDITVLMMSG-SYLF
ACE95890_Methylomonas_sp_LW13_pmoA2  : LLLGEWINRYNFFGWTYFFPINF-VFPAVSLVPGAILDITVLMMSG-SYLF
CAJ01617_Methylocapsa_acidiphila     : LLLGEWINRYNFFGWTYFFPINF-VFPAVSLVPGAILDITVLMMSG-SYLF
ABC59827_Crenothrix_polyspora       : LLLGEWINRYNFFGWTYFFPINF-VFPAVSLVPGAILDITVLMMSG-SYLF
ABU88148_M_fumariolicum_solV_pmoA1   : LLLGEWINRYNFFGWTYFFPINF-VFPAVSLVPGAILDITVLMMSG-SYLF
ABU88152_M_fumariolicum_solV_pmoA2   : LLLGEWINRYNFFGWTYFFPINF-VFPAVSLVPGAILDITVLMMSG-SYLF
ABU88155_M_fumariolicum_solV_pmoA3   : LLLGEWINRYNFFGWTYFFPINF-VFPAVSLVPGAILDITVLMMSG-SYLF
ACC85973_ERBWC_3B                   : LLLGEWINRYNFFGWTYFFPINF-VFPAVSLVPGAILDITVLMMSG-SYLF
ACD68273_Uncultured_ha_bacterium_CCRd316: LLLGEWINRYNFFGWTYFFPINF-VFPAVSLVPGAILDITVLMMSG-SYLF
ACD68281_Uncultured_haw_bact_CCRd431 : LLLGEWINRYNFFGWTYFFPINF-VFPAVSLVPGAILDITVLMMSG-SYLF
ACD68293_ML126_uncultured_bacterium  : LLLGEWINRYNFFGWTYFFPINF-VFPAVSLVPGAILDITVLMMSG-SYLF
ABA58955_Nitrosococcus_oceani_ATCC_19707: LLLGEWINRYNFFGWTYFFPINF-VFPAVSLVPGAILDITVLMMSG-SYLF
ABI60300_Nitrosomonas_eutropha_C91   : LLLGEWINRYNFFGWTYFFPINF-VFPAVSLVPGAILDITVLMMSG-SYLF
ABB74106_Nitrosospira_multiformis_25196 : LLLGEWINRYNFFGWTYFFPINF-VFPAVSLVPGAILDITVLMMSG-SYLF
AAB86881_Nitrosospira_sp_NpAV_pmoA1  : LLLGEWINRYNFFGWTYFFPINF-VFPAVSLVPGAILDITVLMMSG-SYLF
Methylomirabilis_oxyfera_Twente_pmoA : LLLGEWINRYNFFGWTYFFPINF-VFPAVSLVPGAILDITVLMMSG-SYLF
Methylomirabilis_oxyfera_Ooij_pmoA   : LLLGEWINRYNFFGWTYFFPINF-VFPAVSLVPGAILDITVLMMSG-SYLF

```

```

ABK77038_Cenarchaeum_symbiosum      : LILFGGVLVGSLSLPLFMVLLITVA-D--LETA--FKYRPT
ABY89139_Nitrosopumilus_maritimus   : LILFGGVLVGSLSLPLFMVLLITVA-D--LETA--FKYRPT
AAZ81111_Uncultured_crenarchaeote    : LILFGGVLVGSLSLPLFMVLLITVA-D--LETA--FKYRPT
AAU92182_Methylococcus_capsulatus   : TAVVGAMGWGLIFYPGNWPIIPLHVPVEY-NGMLMSIADLQGYHYVRTG
BAE86885_Methylomicrobium_japanese  : TAVVGGLAWGLLFYFPGNWPIIPLHVPVEY-NGMMMTIADLQGYHYVRTG
AAA87217_Methylomicrobium_album_BG8_pmo1: TAVLGGGLAYGLLFYFPGNWPIIPLHVPVEY-NGMVMTLADLQGYHYVRTG
ACE95888_Methylomicrobium_album_BG8_pmo2: TAIIGGSFAFLLFYFSPNWPIIPLHVPVEY-ANQLTLADLFGFOYIRTG
CAE47800_Methylocystis_sp_SC2_pmoA1  : TAVVGSGLGWGLLFYFNNWPIIPLHVPVEY-NGMLMSIADLQGYHYVRTG
CAE48352_Methylocystis_sp_SC2_pmoA2  : TALLGGGLGWGLLFYFIPNWPIIPLHVPVEY-NGMMLTADLQGYHYVRTG
BAF49660_Methylocaldum_sp_T025      : TAVVGGLAWGLIFYPSPNWPIIPLHVPVEY-NGMLMSIADLQGYHYVRTG
AAA87220_Methylosinus_trichosporium_OB3b: TAVVGSGLGWGLLFYFNNWPIIPLHVPVEY-NGMLMSIADLQGYHYVRTG
CAD24093_Methylosinus_trichosporium_KS21: TAVVGSGLGWGLLFYFNNWPIIPLHVPVEY-NGMLMSIADLQGYHYVRTG
CAD24094_Methylosinus_trichosporium_KS21: TAVVGSGLGWGLLFYFNNWPIIPLHVPVEY-NGMLMSIADLQGYHYVRTG
CAD66447_Methylosinus_trichosporium_SM6 : TAVVGSGLGWGLLFYFIPNWPIIPLHVPVEY-NGMMLTADLQGYHYVRTG
CAD30381_Methylosinus_trichosporium_SM6 : TAVVGSGLGWGLLFYFIPNWPIIPLHVPVEY-NGMMLTADLQGYHYVRTG
AAB70518_Methylobacter_sp_BB5_1_pmoA1 : TAVVGGMAWGLLFYFPGNWPIIPLHVPVEY-NGMMFTIADLQGYHYVRTG
ACE95886_Methylobacter_sp_BB5_1_pmoA2 : TSIFGGAAFLLFYFSPNWPIIPLHVPVEY-ANQLTADLFGFOYIRTG
ACE95894_Methylomonas_methanica_S1_pmoA1: TAVVGSGLGWGLLFYFPGNWPIIPLHVPVEY-NGMVMTLADLQGYHYVRTG
ACE95893_Methylomonas_methanica_S1_pmoA2: TSIFGGAAFLLFYFPTNWPIIPLHVPVEY-ANQLTADLFGFOYIRTG
AAF08214_Methylomonas_sp_LW13_pmoA1  : TAVLGGGLAYGLLFYFPGNWPIIPLHVPVEY-NGMMMTIADLQGYHYVRTG
ACE95890_Methylomonas_sp_LW13_pmoA2  : TSIFGGAAFLLFYFPTNWPIIPLHVPVEY-ANQLTADLFGFOYIRTG
CAJ01617_Methylocapsa_acidiphila     : TAVVGAMGWGLLFYFSPNWPIIPLHVPVEY-NGMLMSIADLQGYHYVRTG
ABC59827_Crenothrix_polyspora       : TAVVGSGLGWGLLFYFSPNWPIIPLHVPVEY-NGMMLTADLQGYHYVRTG
ABU88148_M_fumariolicum_solV_pmoA1   : TALIGGELWGLLFYFSPNWPIIPLHVPVEY-NGMLMSIADLQGYHYVRTG
ABU88152_M_fumariolicum_solV_pmoA2   : TAVVGSGLGWGLLFYFIPNWPIIPLHVPVEY-NGMMLTADLQGYHYVRTG
ABU88155_M_fumariolicum_solV_pmoA3   : TYLFGAYAFLLTFYFANWVMIPLHVPVEY-NGMLMSIADLQGYHYVRTG
ACC85973_ERBWC_3B                   : TAALGAIAGLIMFPTSNWPIIPLHVPVEY-NGMLMSIADLQGYHYVRTG
ACD68273_Uncultured_ha_bacterium_CCRd316: TGIFGGLLWGLVFYFPGNWPIIPLHVPVEY-NGMLMSIADLQGYHYVRTG
ACD68281_Uncultured_haw_bact_CCRd431 : TGIFGGLLWGLVFYFPGNWPIIPLHVPVEY-NGMLMSIADLQGYHYVRTG
ACD68293_ML126_uncultured_bacterium  : TGIFGGMLWGLVFYFPGNWPIIPLHVPVEY-NGMLMSIADLQGYHYVRTG
ABA58955_Nitrosococcus_oceani_ATCC_19707: TAVVGSGLMYGLLMYFANWPIIPLHVPVEY-NGMVMTLADLQGYHYVRTG
ABI60300_Nitrosomonas_eutropha_C91   : TAVVGGGFFGLMFYFPGNWPIIPLHVPVEY-NGMLMSIADLQGYHYVRTG
ABB74106_Nitrosospira_multiformis_25196 : TAVVGGGAFGLLFYFPGNWPIIPLHVPVEY-NGMLMSIADLQGYHYVRTG
AAB86881_Nitrosospira_sp_NpAV_pmoA1  : TAVVGGGAFGLLFYFPGNWPIIPLHVPVEY-NGMLMSIADLQGYHYVRTG
Methylomirabilis_oxifera_Twente_pmoA : TALFGGMWGLLFYFANWPIIPLHVPVEY-NGMLMSIADLQGYHYVRTG
Methylomirabilis_oxifera_Ooij_pmoA  : TALFGGMWGLLFYFANWPIIPLHVPVEY-NGMLMSIADLQGYHYVRTG

```

#

```

ABK77038_Cenarchaeum_symbiosum      : LPFYMTPIEPVVGKIFYN
ABY89139_Nitrosopumilus_maritimus   : LPFYMTPIEPVVGKIFYN
AAZ81111_Uncultured_crenarchaeote    : LPFYMTPIEPVVGKIFYN
AAU92182_Methylococcus_capsulatus   : TPEYIRMVEKGTTLRTFG
BAE86885_Methylomicrobium_japanese  : TPEYIRMVEKGTTLRTFG
AAA87217_Methylomicrobium_album_BG8_pmo1: TPEYIRMVEKGTTLRTFG
ACE95888_Methylomicrobium_album_BG8_pmo2: MPEYLRRIERGTLRTFG
CAE47800_Methylocystis_sp_SC2_pmoA1  : MPEYIRMVERGTTLRTFG
CAE48352_Methylocystis_sp_SC2_pmoA2  : TPEYIRMVERGTTLRTFG
BAF49660_Methylocaldum_sp_T025      : TPEYIRMVEKGTTLRTFG
AAA87220_Methylosinus_trichosporium_OB3b: MPEYIRMVERGTTLRTFG
CAD24093_Methylosinus_trichosporium_KS21: MPEYIRMVERGTTLRTFG
CAD24094_Methylosinus_trichosporium_KS21: TPEYIRMVERGTTLRTFG
CAD66447_Methylosinus_trichosporium_SM6 : TPEYIRMVERGTTLRTFG
CAD30381_Methylosinus_trichosporium_SM6 : MPEYIRMVERGTTLRTFG
AAB70518_Methylobacter_sp_BB5_1_pmoA1 : TPEYIRMVEKGTTLRTFG
ACE95886_Methylobacter_sp_BB5_1_pmoA2 : MPEYLRRIERGTLRTFG
ACE95894_Methylomonas_methanica_S1_pmoA1: TPEYIRMV-----
ACE95893_Methylomonas_methanica_S1_pmoA2: MPEYLRRIERGTLRTFG
AAF08214_Methylomonas_sp_LW13_pmoA1  : TPEYIRMVEKGTTLRTFG
ACE95890_Methylomonas_sp_LW13_pmoA2  : MPEYLRRIERGTLRTFG
CAJ01617_Methylocapsa_acidiphila     : MPEYLRRIERGTLRTFG
ABC59827_Crenothrix_polyspora       : TPEYIRMVEKGTTLRTFG
ABU88148_M_fumariolicum_solV_pmoA1   : TPEYIRMVEKGTTLRTFG
ABU88152_M_fumariolicum_solV_pmoA2   : TPEYIRMVETGTRSA
ABU88155_M_fumariolicum_solV_pmoA3   : IPEYLRMIESTLRTFG
ACC85973_ERBWC_3B                   : TPEYLRRIERGTLRTFG
ACD68273_Uncultured_ha_bacterium_CCRd316: TPEYIRRIERGTLRTFG
ACD68281_Uncultured_haw_bact_CCRd431 : TPEYIRRIERGTLRTFG
ACD68293_ML126_uncultured_bacterium  : TPEYIRRIERGTLRTFG
ABA58955_Nitrosococcus_oceani_ATCC_19707: TPEYIRMIEKGTTLRTFG
ABI60300_Nitrosomonas_eutropha_C91   : TPEYVRLIEQSLRTFG
ABB74106_Nitrosospira_multiformis_25196 : TPEYVRLIEQSLRTFG
AAB86881_Nitrosospira_sp_NpAV_pmoA1  : TPEYVRLIEQSLRTFG
Methylomirabilis_oxifera_Twente_pmoA : TPEYIRIVERGTTLRTFG
Methylomirabilis_oxifera_Ooij_pmoA  : TPEYIRIVERGTTLRTFG

```

b.

```

%          +          *          +          *
ABK77030_Cenarchaeum_symbiosum_A : LPSAEAHGVQAQLQSRFRIEDEFN-----RQSLQTGETLCLAGS
ABY89142_Nitrosopumilus_maritimus_SCM1 : LPTADAHGVQAQLQSRFRIEDEFN-----RQSLQTGETLVLQGT
AAU92183_Methylococcus_capsulatus_Bath : ASAHGEKSQAAPFMRRTIHWYDLNWSKE---KVKINETVEIKGKPHVFEG
BAE86886_Methylococcobium_japanense_NI : ASAHGEKSQAAPFMRRTIHWYDLNWSK---MVSVNEMTMSISGKPHVFEG
ACE95889_Methylococcobium_album_BG8_pmb2 : ALAHGEKALEPFI RMRTIQWYDVQVWSK---QFKVNEEVTVSGRPHVFAED
CAE47801_Methylocystis_sp_SC2_pmoB1 : ASAHGEKSQAAPFMRRTLNWYDVQVWSKT---TVNVNEEMVLSGKIHFVSA
CAE48353_Methylocystis_sp_SC2_pmoB2 : AAHAGERSQAAPFMRRTLNWYDVQVWSKT---ELNVNDEMELTGVKPHVFSG
BAF49661_Methylocaldum_sp_T_025 : ASAHGEKSQAAPFMRRTIHWYDLNWSKE---KVKVNEEVEITGKPHVVFEG
AAF37894_Methylosinus_trichosporium_OB3b : AEAHGEKSQAAPFMRRTLNWYDVQVWSKT---SLNVNESMVLGSKVHFVSA
ACE95887_Methylobacter_sp_BB5_1_pmoB2 : AQAHGEKALEPFI RMRTIQWYDVQVWSKT---KFNVDDEVSVSGKPHVFAED
ACE95892_Methylomonas_methanica_S1_pmoB2 : AQAHGEKALEPFI RMRTIQWYDVQVWSKT---KFNVDDEVSVSGKPHVFAED
CAJ01618_Methylocapsa_acidiphila_B2 : ADAHGEKSQAAPFMRRTLNWYDVQVWSKT---SLNVNEEMEITGKLIHMADA
ABU88156_M_fumariolicum_SolV_pmoB1 : ASGIGERAQEAAILRMRTAQFYDVRFSN---HLKVGEDLVVTVGKVMILPI
ABU88149_M_fumariolicum_SolV_pmoB2 : VQGMGAKSQAAPFMRRTVFFDTRFSFTPNRNVKVGDEFCTGKVMMLMPT
ABU88153_M_fumariolicum_SolV_pmoB3 : VQGMGAKSQAAPFMRRTVFFYDTQFSFAPTNRNVKVGEEFSTGKVMMLMPT
ABA58954_Nitrosococcus_oceani_ATCC19707 : VAAHGEKQAAPFMRRTIHWYDMVWSK---TIAVNETYITGKPHVVFED
ABI60299_Nitrosomonas_eutropha_C91 : VAAHGEKSQEPFLRMRTVQWYDVQVWSKPE---VTKVNEAQITGKPHLAED
ABB74107_Nitrosospira_multiformis_25196 : AAHAGERSQEPFLRMRTIQWYDMKWSKPE---TTKVNDIATMTGKPHLAED
AAB86882_Nitrosospira_sp_NpAV_amoB1 : AAHAGERSQEPFLRMRTIQWYDMKWSKPD---TTKVNDFATMTGKPHLAED
Methylomirabilis_oxifyfera_Twente_pmoB : AAHAGERSQEPFLRMRTITFYDTKWSKA---RVQPGETMDLTGKPHTFSE
Methylomirabilis_oxifyfera_Ooij_pmoB : AWAHAGERSQEPFLRMRTITFYDTKWSKA---RVQPGETMDLTGKPHTFSE

60          *          80          *          100
ABK77030_Cenarchaeum_symbiosum_A : FVSLVERDLRGWNSIFSESTNAGNRWEILSRD---PPGNVFDIPGNSEI
ABY89142_Nitrosopumilus_maritimus_SCM1 : LVSLVERDLRGWISIFSESTNAGNRWEMLSRD---PPGNVFDIPGNVVV
AAU92183_Methylococcus_capsulatus_Bath : WPETVDEPDVAFLNVGMPGPVPIRKESYIGGQ---LVPRSVRLEIGKTY
BAE86886_Methylococcobium_japanense_NI : WPETVDEPDVAFLNIGIPGPVPIRAGSWIGGQ---LVPRSVRLEIGKTY
ACE95889_Methylococcobium_album_BG8_pmb2 : WPVSVKPDAAFLNVSTPGPVLIRTERWLNK---PWNSVALQPPGGDY
CAE47801_Methylocystis_sp_SC2_pmoB1 : WPQAVANPRVSLNAGEPGPVLIRKSAFVGEV---FAPRSVSLVPGNDY
CAE48353_Methylocystis_sp_SC2_pmoB2 : WPQAVARPGESFLNAGEPGPVLIRKSAFVGEV---FAPRSVSLVPGNDY
BAF49661_Methylocaldum_sp_T_025 : WPETVAEPDVAFLNIGIPGPVPIRKASYIGGQ---LVPRSVRLEIGKTY
AAF37894_Methylosinus_trichosporium_OB3b : WPQAVANPKSSFLNAGEPGPVLIRKSAFVGEV---FAPRSVSLVPGNDY
ACE95887_Methylobacter_sp_BB5_1_pmoB2 : WPI SVKPEASFLNISTPGPVLIRTERYLNK---PWNSVALQPPGGDY
ACE95892_Methylomonas_methanica_S1_pmoB2 : WPVSVKPEASFLNISTPGPVLIRTERYLNK---PWNSVALQPPGGDY
CAJ01618_Methylocapsa_acidiphila_B2 : WPVAVAKPEVAFLNVGMPGPVLRREGSFLGGQ---FVPRSTSLLEIGKTY
ABU88156_M_fumariolicum_SolV_pmoB1 : WPHLGFSGIAYINFFEPGPRVLRKETSIVNGO---PVFSMIVKLGDTY
ABU88149_M_fumariolicum_SolV_pmoB2 : WPQETPFGSIFFFNFVPGPQVLRKAIWNEKY---FQFNSVLEKGGVY
ABU88153_M_fumariolicum_SolV_pmoB3 : WPEEIPFTGISFFNFVPGPQVLRKAIWNEKY---FQFNSVLEKGGVY
ABA58954_Nitrosococcus_oceani_ATCC19707 : WPEAVEKPHVSLNAGQPGPVLIRKSAFVGEV---FVPRISGLELGGDY
ABI60299_Nitrosomonas_eutropha_C91 : WPRAAARPDFAFNVGSPSSVYVRLSTKLNH---PWFISGPLELGGDY
ABB74107_Nitrosospira_multiformis_25196 : WPRAVGKPGRAFFNVGSPSPVFRVRLSTKLNH---PTYISGPMELGRDY
AAB86882_Nitrosospira_sp_NpAV_amoB1 : WPRAVGKPGRAFFNVGSPSPVFRVRLSTKLNH---PTYISGPLELGRDY
Methylomirabilis_oxifyfera_Twente_pmoB : WPRAVNTPEISIFLHYSVPGPSMLKKEAWMNGM---PVINATSTQLGGDY
Methylomirabilis_oxifyfera_Ooij_pmoB : WPRAVNTPEISIFLHYSVPGPSMLKKEAWMNGM---PVINATSTQLGGDY

%          %          *          *          120          *          140          *
ABK77030_Cenarchaeum_symbiosum_A : PYEICALALEPGVYHVHTQLNVATVGPGLGPGQTVVVDGE----FILKE
ABY89142_Nitrosopumilus_maritimus_SCM1 : DYQLSAKALEAGVYHVHTQLNVAQVGPGLGPGQTVVVEGE----PIIKP
AAU92183_Methylococcus_capsulatus_Bath : DFRVVLKARRPGDWHVHTMMNVQGGGPIIGPGKWITVEGSMSEFRNPVTT
BAE86886_Methylococcobium_japanense_NI : EFKVLLKARRPGDWHVHTMMNVQGGGPIIGPGKWITITGSMGDFKPNPIT
ACE95889_Methylococcobium_album_BG8_pmb2 : EFKVLLKARRPGDWHVHTMMNVQGGGPIIGPGKWITITGSMGDFKPNPIT
CAE47801_Methylocystis_sp_SC2_pmoB1 : AFSINLRGRRAGRWHVHAQINVEGGGPIIGPGQWIEIKGDMKDFDTPVTL
CAE48353_Methylocystis_sp_SC2_pmoB2 : EYKIVLKARRQGRYHVHVQINVKDGGPIIGPGQWITIKGDMKDFDTPVTL
BAF49661_Methylocaldum_sp_T_025 : DFKVVLKARRPGDWHVHTMMNVQGGGPIIGPGKWITIEGSMSEFKNPVTT
AAF37894_Methylosinus_trichosporium_OB3b : AFSIDLKARRAGRWHVHAQINVEGGGPIIGPGQWIEIKGDMADFKDPVTL
ACE95887_Methylobacter_sp_BB5_1_pmoB2 : -----
ACE95892_Methylomonas_methanica_S1_pmoB2 : DFKVVLKARRLPGRYHIHPFNKLDAGQVMGPGVWLEIGGNPSDFNTTIKT
CAJ01618_Methylocapsa_acidiphila_B2 : EFRVLLKARRQGRWHVHTQLSVDQGGPIIGPGQWIEIKGDMADFKNPVTL
ABU88156_M_fumariolicum_SolV_pmoB1 : DFKVVLKARRPGTWVPGVTMNIKDIGPIVGPPIKVTIDPSSAPFTNTVQT
ABU88149_M_fumariolicum_SolV_pmoB2 : EYKMNQARTPGIWPVGPVMSMEEAGPPIIGPEEFLTIEGSGAGFTNPVKT
ABU88153_M_fumariolicum_SolV_pmoB3 : AYKMNQARNPFIIPMGPMLSMEEAGPPIIGPEEFLTIEGSKGFANPVKT
ABA58954_Nitrosococcus_oceani_ATCC19707 : EFEMTMQGRRPGTWHVHTLLNVQGGGPIIGPGKIITITGDMADFESKITD
ABI60299_Nitrosomonas_eutropha_C91 : AFEVQLRARIPGRHHMHAMLNVDKAGPIAGPGAWMNVGSDWDDFTNPLKL
ABB74107_Nitrosospira_multiformis_25196 : AFEVRLKARIPGRHHMHAMVNIKDGPIAGPAAWNIIGSDWDDFTNPKVL
AAB86882_Nitrosospira_sp_NpAV_amoB1 : AFEVRLKARIPGRHHMHAMVNIKDGPIAGPAAWNIIGSDWDDFTNPKVL
Methylomirabilis_oxifyfera_Twente_pmoB : DYRMINMGRVTGTIVHVPVNIIEGGGPIVGGGFEFVTVGSDWNSFTNNVTT
Methylomirabilis_oxifyfera_Ooij_pmoB : DYRMINMGRVTGTIVHVPVNIIEGGGPIVGGGFEFVTVGSDWNSFTNNVTT

```

```

                                160          *          180          *          200
ABK77030_Cenarchaeum_symbiosum_A : IPYTNIAQSIIGVGYVITFATRPQVI-----
ABY89142_Nitrosopumilus_maritimus_SCM1 : IPYTNIAQSIMIGVGYVITFAT-----
AAU92183_Methylococcus_capsulatus_Bath : LTGQTVLDLENYNEGNTYFWHAFWFAIGVAWIGYWSRRPIFIPRLLMVDAG
BAE86886_Methylomicrobium_japanense_NI : LTGETIDLETYALDGVYGHLLFWYVLGVAMWVYWCRRKPVFIPRRIAVDAG
ACE95889_Methylomicrobium_album_BG8_pmoB2 : -----
CAE47801_Methylocystis_sp_SC2_pmoB1 : LDGSTVDLETYGISRVYAWHLLPWLAVGAAILFWFVRKGI IASYLVRVATG
CAE48353_Methylocystis_sp_SC2_pmoB2 : LEGSTIDLETYGITWTYIYHFFWMAAAAAILYWFMTKGI IIVRYWQVKAG
BAF49661_Methylocaldum_sp_T_025 : LTGQTVLDLETYNEGNTYFWHGASGSAIGMCLGWYWGTVVRRFLPRLPDG
AAF37894_Methylosinus_trichosporium_OB3b : LDGTTVDLETYGDRIYAWHFPWMIAAAAILYWFPKKGI IASYLRISEG
ACE95887_Methylobacter_sp_BB5_1_pmoB2 : -----
ACE95892_Methylomonas_methanica_S1_pmoB2 : INGELIDMESFGFANGVFWHLLF-----
CAJ01618_Methylocapsa_acidiphila_B2 : LNGEVIDLEQYKIGNIYFWHTVWFVAGVAWVYWFRRKRGFVGRYIISVAG
ABU88156_M_fumariolicum_SolV_pmoB1 : LSGQSIINLENYGLSRAMGWSFLWVLLGIGWLLYLLKPTAPRLGLAYLE
ABU88149_M_fumariolicum_SolV_pmoB2 : LLGNTIDLENYEGRMIAWTLTSAIAVWVWVYVWCKPPT-RRGLVAAG
ABU88153_M_fumariolicum_SolV_pmoB3 : LLGNTVDLENYGTARVITWTIFTTLIGVWVWGLYWLAKPPT-RRGLVAAG
ABA58954_Nitrosococcus_oceani_ATCC19707 : LTGNTVNLLETMATGTVIGWHLFWYVLGIAIWWWARRPMFLPRYMRIEAG
ABI60299_Nitrosomonas_eutropha_C91 : LTGETIDSETFNLSNGIFWHLLWMSIGIFWIGIFVARPMFLPRSRVLLAY
ABB74107_Nitrosospira_multiformis_25196 : LTGETIDTETFNFSNGIFWHLLWLSLGIWIGYVVARPMFLPRSRVLLAY
AAB86882_Nitrosospira_sp_NpAV_amoB1 : LTGETIDTETFNFNNGIFWHLLWLGCFWIGYVVARPMFLPRSRVLLAY
Methylomirabilis_oxyfera_Twente_pmoB : IDGTTVNMEVHGQGRIGWLLWTFVGVFWLLWVRRPPT-RRLFQVGVV
Methylomirabilis_oxyfera_Ooij_pmoB : IDGTTVDMVHGQGRIGWLLWTFVGVWLLGWXXRPPT-RRLFQVGVV

```

```

                                *          220          *          240          *
ABK77030_Cenarchaeum_symbiosum_A : -----
ABY89142_Nitrosopumilus_maritimus_SCM1 : -----
AAU92183_Methylococcus_capsulatus_Bath : RAD---ELVSATDRKVMGFLAATILIVVMAMSSANSKYPIITIPLOAGT
BAE86886_Methylomicrobium_japanense_NI : KAD---SLITPTDKKVGMAFAAGTMAIIVAIMGQANEKYPVTTPLQAGL
ACE95889_Methylomicrobium_album_BG8_pmoB2 : -----
CAE47801_Methylocystis_sp_SC2_pmoB1 : KVD---EQVTDDDKRIGAILVALTILATIVGYAVTNSTFPRTIPLQAGL
CAE48353_Methylocystis_sp_SC2_pmoB2 : KGR---ELIQDEKRIGAVTLAAVLLAVLVFYASANREFPRTPLMQAGL
BAF49661_Methylocaldum_sp_T_025 : RSGSCERADFGVTKKVMGFAAATILIVIFAMSSANSKYPIITIPLOAGT
AAF37894_Methylosinus_trichosporium_OB3b : KDE---EQIGDDDRRVGAIVLAVTILATIIGYAVTNSTFPRTIPLQAGL
ACE95887_Methylobacter_sp_BB5_1_pmoB2 : -----
ACE95892_Methylomonas_methanica_S1_pmoB2 : -----
CAJ01618_Methylocapsa_acidiphila_B2 : KGG---ELITPLERQIGAGALAAATLLVVIISYALTASEFPRTIPLQAGN
ABU88156_M_fumariolicum_SolV_pmoB1 : KED---ELVTKQDQKFGFLFLAIVIVLVFGGAFITSKQFPPIVPLQKTF
ABU88149_M_fumariolicum_SolV_pmoB2 : RKE---DLFSPMDRQVCFLLFTIGTIVLVAAMITKAQYPIITIPLOQETK
ABU88153_M_fumariolicum_SolV_pmoB3 : RKE---ELFNPDLRQVCFLLFTVGTIVIVAAAALITKAQYPIITIPLOQETK
ABA58954_Nitrosococcus_oceani_ATCC19707 : EAN---DLVTAQDKKLTIGVLVGVLLIILFGFKSAEDKFPVTTIPLQAGL
ABI60299_Nitrosomonas_eutropha_C91 : GDD---LLLDPMDDKKTIVWVLAALLTALIVWGGYRYTETKHPYTVPIQAGE
ABB74107_Nitrosospira_multiformis_25196 : GDE---LLLDPMDDKVAWVLLITFGIVWGGYRYTETKHPYTVPIQAGE
AAB86882_Nitrosospira_sp_NpAV_amoB1 : GDD---LLLDPMDDKVAWVLLIATFGIVWGGYRYTETKHPYTVPIQAGE
Methylomirabilis_oxyfera_Twente_pmoB : PEE---ELVSPGDRTLGLVLMIAATVLIIVAIYVVTNGAYPIITIPLOQTR
Methylomirabilis_oxyfera_Ooij_pmoB : PEE---ELVSSGDRTLGLVLMIAATVLIIVAIYVVTNGAYPIITIPLOQTR

```

```

                                260          *          280          *          300
ABK77030_Cenarchaeum_symbiosum_A : -----
ABY89142_Nitrosopumilus_maritimus_SCM1 : -----
AAU92183_Methylococcus_capsulatus_Bath : MRGMKPLELPAP-----TVSVKVEDATYRVVPGRAMRMKLTITNHGNSPI
BAE86886_Methylomicrobium_japanense_NI : MRGIKSLELPQP-----TVSVKVVDSYRVVPGRAMQMTLEITNNGDSAV
ACE95889_Methylomicrobium_album_BG8_pmoB2 : -----
CAE47801_Methylocystis_sp_SC2_pmoB1 : QKPLTPLVTDGTAGVGKERVTSSELNGGVYKVPGRELTINVKVTNSTSEPL
CAE48353_Methylocystis_sp_SC2_pmoB2 : LTGISPIDEPR-----STVAVQFKGGSYTVVPGRELRI RAKVTNNGKEPI
BAF49661_Methylocaldum_sp_T_025 : LRGIQPIIEPK-----ATVAVKVNDASRVVPGRAMRMKLTITNNGDKPV
AAF37894_Methylosinus_trichosporium_OB3b : QKPLTPIIEBGTAGVGHVVTAEELKGGVYKVPGRELTIQVKVTNKTDDEPL
ACE95887_Methylobacter_sp_BB5_1_pmoB2 : -----
ACE95892_Methylomonas_methanica_S1_pmoB2 : -----
CAJ01618_Methylocapsa_acidiphila_B2 : IRAIDALNIPE-----SPIKVEYLRGTYKVPGRELVATYKITNTGKPEV
ABU88156_M_fumariolicum_SolV_pmoB1 : VRINPLPKEST-----FVEAKVSKATYVYVQQRSLDFDLITVTKGNEKV
ABU88149_M_fumariolicum_SolV_pmoB2 : YIIKPLPPEPA-----LIQAEVTDATYDVPGRITLSFHLQVKNIGDKPV
ABU88153_M_fumariolicum_SolV_pmoB3 : YIIKPLPPEPT-----LIQAEVTDATYDVPGRITLSFHLQVKNIGDKPV
ABA58954_Nitrosococcus_oceani_ATCC19707 : LGTIDSLPVDYN-----SMVSNVVKANYRVVPGRTISMTVEITNHTDQVI
ABI60299_Nitrosomonas_eutropha_C91 : SKVAPLVPAPN-----PVAIKITDANYDVPGRALRVSMVETNNGDTPV
ABB74107_Nitrosospira_multiformis_25196 : SKVEPLPVKPN-----PIAIKVTHANYDVPGRALRVSMVETNNGDTPV
AAB86882_Nitrosospira_sp_NpAV_amoB1 : SKVQPMVPKPN-----PIAIKVTHANYDVPGRALRVSMVETNNGDTPV
Methylomirabilis_oxyfera_Twente_pmoB : MDTPELKPTTEFTPYSHATVKARPVTAVYTVVPGRLGMVIEVTNGSNRPQ
Methylomirabilis_oxyfera_Ooij_pmoB : MDTPELKATTEFTPYAHATVKARPVTAVYTVVPGRLGMVIEVTNGSNRPQ

```

```

*           320           *           340           *
ABK77030_Cenarchaeum_symbiosum_A : -----
ABY89142_Nitrosopumilus_maritimus_SCM1 : -----
AAU92183_Methylococcus_capsulatus_Bath : RLGEFYTASVRFLLSDVYKDTTGYPEDLLAEDGLSVSDNSPLAPGETRTV
BAE86886_Methylococcobium_japanense_NI : RLAEFNTASVRFLLDADVYEDDTNYPDDLLAEEGLSVSDNSPLAPGETRTV
ACE95887_Methylococcobium_album_BG8_pmB2 : -----
CAE47801_Methylocystis_sp_SC2_pmoB1 : RLGEYTAAGLRFLNPDVFTTKPDFDYLLADRGLS-TDPTPIAPGETKEI
CAE48353_Methylocystis_sp_SC2_pmoB2 : RLGEFTSAGLRFLNPDVFTTRPDPDYLLADRGLSVSDPNPIAPGETRDL
BAF49661_Methylocaldum_sp_T_025 : RLGEFYTASVRFLLDADVYKDTTGYPEDLLADDGLSEVSDNSPIQGETRTV
AAF37894_Methylosinus_trichosporium_OB3b : KLGEYTAAGLRFLNPDVFTTKPEFPDYLLADRGLS-TDPTPLAPGETKTI
ACE95887_Methylobacter_sp_BB5_1_pmoB2 : -----
ACE95892_Methylomonas_methanica_S1_pmoB2 : -----
CAJ01618_Methylocapsa_acidiphila_B2 : RVGEFATATLRFLLNPDVYTKVDYPEYILAERGLSLSDNAP IAPGETKEL
ABU88156_M_fumariolicum_SolV_pmoB1 : YLRRFQTANVAFLNPAAPDNQWPADSPVNGGELQITPNEPILPGETKQL
ABU88149_M_fumariolicum_SolV_pmoB2 : VLKEFLTANVRFLLNPDVPGNTWNNENNPEVNGGPMRVTPEP INPGETKTL
ABU88153_M_fumariolicum_SolV_pmoB3 : VLKEFLTANVRFLLNPDIPGNTWNPSPFPEVNGGPMKVSPEP INPGETKTI
ABA58954_Nitrosococcus_oceani_ATCC19707 : SIGEFNTGGIRFMNANVRVDETDYPELLAPEGLEVSQDD-IAPGETVVV
ABI60299_Nitrosomonas_eutropha_C91 : TFGFETTAGIRFVNSTGRKYLDQYPRLELVAVGLNFDDGAIQGETKQL
ABB74107_Nitrosospira_multiformis_25196 : RIGFETTAVGRFINKVGLKHLDRGYPKELVATGLSFDNETPIQGETREV
AAB86882_Nitrosospira_sp_NpAV_amoB1 : RIGFETTAVGRFINKVGLKHLDRNYPKELVATGLSFDNDAP IQGETREV
Methylomirabilis_oxifera_Twente_pmoB : QLGGFTTANLQFRDPALFPDSR-----LKKIKVEPAGPIPPGQVTVM
Methylomirabilis_oxifera_Ooij_pmoB : QLGGFTTANLQFRDPALFPDSR-----LKKIKVEPAGPIAPGQVTVL

```

```

360           *           380           *           400
ABK77030_Cenarchaeum_symbiosum_A : -----
ABY89142_Nitrosopumilus_maritimus_SCM1 : -----
AAU92183_Methylococcus_capsulatus_Bath : DVTASDAAEVYRLSDI IYDPDSRFAGLLFFFDATGNRQVVQIDAPLIPS
BAE86886_Methylococcobium_japanense_NI : DVTASDAAEVYRLADLIYDPDSRFAGLLFFIDEDGNRQMTMVDAPLIPT
ACE95889_Methylococcobium_album_BG8_pmB2 : -----
CAE47801_Methylocystis_sp_SC2_pmoB1 : AVKQDARWDIERLSLAYDSDS QIGGLMFFSPTGRRFAAIEGGPVIPK
CAE48353_Methylocystis_sp_SC2_pmoB2 : EVIVQDARFDIERLSLAYDSDS QFGGLLFFS PSEGERQRAEIEGGPVIPK
BAF49661_Methylocaldum_sp_T_025 : EVTASDAAEVYRLSDI IYDPDSRFAGLLFFFDQGGQRIYVQIDAPLIPS
AAF37894_Methylosinus_trichosporium_OB3b : EVKQDARWDIERLSLAYDSDS QIGGLMFFS PSEGERQRAEIEGGPVIPK
ACE95887_Methylobacter_sp_BB5_1_pmoB2 : -----
ACE95892_Methylomonas_methanica_S1_pmoB2 : -----
CAJ01618_Methylocapsa_acidiphila_B2 : TVKQDARWDTERLADLAYDVSS FAGLMFFFTPSGARYEVETGGPVIPK
ABU88156_M_fumariolicum_SolV_pmoB1 : HIKAQGAWEVERLSTIYKESRRFGLLIPFGDTAGNRNIIAIDQFVVP
ABU88149_M_fumariolicum_SolV_pmoB2 : EVMSQSAEWEENQRLT-MYHETNRFGLLFFFTDTSGTQVFAIADQI VIP
ABU88153_M_fumariolicum_SolV_pmoB3 : EVMSQSAEWEENQRLT-MYNETNRFGLLFFFTDPSGTQVFAIADQI VIP
ABA58954_Nitrosococcus_oceani_ATCC19707 : DISATDAAEVYQRMADVIYDPDSRFAGLIFVDPVEGNEIPIPIGGPLVPT
ABI60299_Nitrosomonas_eutropha_C91 : RMEAKDALWEIQRLMALLGDPESRFGGLLMSWDSSEGRHINSIAGPVIPV
ABB74107_Nitrosospira_multiformis_25196 : KMEAKDALWEVQRLMALLGDPESRFGGLLMTWSDGDRNINSIAGAVIPV
AAB86882_Nitrosospira_sp_NpAV_amoB1 : KMVAKDALWEVQRLMALLGDPESRFGGLLMTWSDGDRNINSIAGAVIPV
Methylomirabilis_oxifera_Twente_pmoB : SIDATDAAEVYQRLAELIYDSRSRYGGLLEFFFDADKNRQIIVEVGGP-VIP
Methylomirabilis_oxifera_Ooij_pmoB : SVDATDAAEVYQRLAELIYDSRSRYGGLLEFFFDADKNRQIIVEVGGP-VIP

```

## C

```

*           20           *           40           *
ABK77035_Cenarchaeum_symbiosum_A : -MLMAQMPALIPKEVEIQRLKKIWMIMIAMGSAASVEVDNFVDSGLHQT
ABY89141_Nitrosopumilus_maritimus_SCM1 : MITMAQMPALIPKEVEIQRLKKIWLIVIAMGSTAASVEVDNFVDSGLHQT
AAU92181_Methylococcus_capsulatus_Bath : WMNPLYTEIVLEIVTASILWGYLWKT-RDR--NLAALTPREELRRNFT-H
BAE86884_Methylococcobium_japanense_NI : WMNPLYTEIVLEIVTASILWGYLWKS-RDR--KVMSTPREELRRHLLT-H
CAE47799_Methylocystis_sp_SC_pmoC1 : WMSILWTEIPLLEISGIGLAGFLWKT-RTR--DFSTLTAREEMRRLVV-E
CAE48351_Methylocystis_sp_SC2_pmoC2 : WMNLMWTELEPVEVAFVFCGIGGYLWKT-RDR--NIDAVAPREEMRRLIT-L
BAF49659_Methylocaldum_sp_T_025_pmoC : WMNPLYTEIVLEVVTSILWGYLWKT-RDR--NMAALAPREELRRNMT-H
AAF37893_Methylosinus_trichosporium_OB3b : WLSILWTEIPLLEVSGLALAGLWKT-RDR--NVDVAPREELRRHV-L
CAJ01616_Methylocapsa_acidiphila_pmoC : WMTILYIEEPTLEIAFLGLIGYLWKT-RPN--DLDTVAPREELRRIFY-L
ABU88150_M_fumariolicum_SolV_pmoC1 : WMSILYTELILEPTTLIALCSWLWVT-RDR--AMENLAPAEELRRYWN-L
ABU88151_M_fumariolicum_SolV_pmoC2 : WMNLLALELALAEALSFIACVTLWLVVT-RDR--NLENI SPVEELRRYWN-L
ABU88154_M_fumariolicum_SolV_pmoC3 : WMNLFWGITIMNVIWGLTWGWIWVYRDR--HLEQLNPGEEELKRWYSNW
ABA58956_Nitrosococcus_oceani_ATCC_19707 : WMNLLYIELVVEALATAALVSYLIKT-RDR--NMEAMTPREELRRYCT-L
ABI60301_Nitrosomonas_eutropha_C91 : WMGLWRVHMAIMPLFALVTVGWIWKT-RDTEEQLNNDPKLEIKRYFY-Y
ABB74105_Nitrosospira_multiformis_25196 : WMGLWRVHMIVMPLFALITWGIWKT-RDTEQQLDNLDPKLEVCRYFY-W
AAC69319_Nitrosospira_sp_NpAV_amoC1 : WMGLWRVHMIVMPLFALVTVGWIWKT-RDT--NLDNLDPKLEIKRYFY-W
Methylomirabilis_oxifera_Twente_pmoC2 : WMNMLIGELIEGAVLTFALGYIWKTRDR--NLDKIPPEELRRFWG-L
Methylomirabilis_oxifera_Twente_pmoC1 : WMNMLIGELIEGAVLTFALGYIWKTRDR--NLDKIPPEELRRFWG-L
Methylomirabilis_oxifera_Ooij_pmoC1 : WMNMLIGELIEGAVLVFTLGYIWKTRDR--NLDRI TPPEELRRFWG-L
Methylomirabilis_oxifera_Ooij_pmoC2 : WMNMLIGELIEGAVLVFTLGYIWKTRDR--NLDRI TPPEELRRFWG-L

```

```

                                # # # *
ABK77035_Cenarchaeum_symbiosum_A : SIRDSAFTPAHWWLYSHFVALPLGWGSVAIYDR-----
ABY89141_Nitrosopumilus_maritimus_SCM1 : SIRDSAFTPAHWWLYSHFVALPLGWGSAAIYDR-----
AAU92181_Methylococcus_capsulatus_Bath : LVWLVAWAWAIYWGASYFTEQDGTWHQTVIRDTDFTPSHIIEFYLSYPIY
BAE86884_Methylococcobium_japanense_NI : WTWLMYGIAYFGASYFTEQDGTWHQTVIRDTDFTPSHIIEFYLSYPIY
CAE47799_Methylocystis_sp_SC_pmoC1 : VQWLVVYAAAIYWGASFFTEQDGTWHMTVIRDTDFTPSHIIEFYMSYPIY
CAE48351_Methylocystis_sp_SC2_pmoC2 : IGWLAVYAFSVYWGASYFTEQDGTWHQTVIRDTDFTPSHIIEFYLSYPIY
BAF49659_Methylocaldum_sp_T_025_pmoC : LIWLFAYAWAIYWGASYFTEQDGTWHQTVIRDTDFTPSHIIEFYLSYPIY
AAF37893_Methylosinus_trichosporium_OB3b : VEWLVVYAVAIYWGASFFTEQDGTWHMTVIRDTDFTPSHIIEFYMSYPIY
CAJ01616_Methylocapsa_acidiphila_pmoC : FNWIFVYGVAIYWGASYFTEQDGTWHQTVIRDTDFTPSHIIEFYMSYPIY
ABU88150_M_fumariolicum_SolV_pmoC1 : GLYLVVYTTLLYWGASYFTEQDGTWHQTVIRDTDFTPSHIIEFYQSYPIY
ABU88151_M_fumariolicum_SolV_pmoC2 : GLFIVVYTVGLYWGASYFTEQDGTWHQTVIRDTDFTPSHIIEFYQSYPIY
ABU88154_M_fumariolicum_SolV_pmoC3 : LITLGVYAWCLVW-AVFFVEQDGVWHSSMIRDETEPTPSHIFNFYLSWPIF
ABA58956_Nitrosococcus_oceani_ATCC_19707 : YMWVVYGVGLFWGASFFTEQDGAWHQTVVIRDTDFTPSHIIEFYMSYPIY
ABI60301_Nitrosomonas_eutropha_C91 : MMWLVYIFGVYWGGSFFTEQDASWHQVIIRDTSFTPSHVYVYFSGFPMY
ABB74105_Nitrosospora_multiformis_25196 : MMWLVYIFGVYWGGSFFTEQDASWHQVIIRDTSFTPSHVYVYFSGFPMY
AAC69319_Nitrosospora_sp_NpAV_amoC1 : MMWLVYIFGVYWGGSFFTEQDASWHQVIIRDTSFTPSHVYVYFSGFPMY
Methylomirabilis_oxifera_Twente_pmoC2 : GQWIATPAWAVYWGASFFTEQDGTWHQTVIRDTDFTPSHIIEFYLSYPIY
Methylomirabilis_oxifera_Twente_pmoC1 : GQWIATPAWAVYWGASFFTEQDGTWHQTVIRDTDFTPSHIIEFYLSYPIY
Methylomirabilis_oxifera_Ooij_pmoC1 : GQWIVTFAWAVYWGASFFTEQDGTWHQTVIRDTDFTPSHIIEFYLSYPIY
Methylomirabilis_oxifera_Ooij_pmoC2 : GQWIVTFAWAVYWGASFFTEQDGTWHQTVIRDTDFTPSHIIEFYLSYPIY

                                * 120 * 140 *
ABK77035_Cenarchaeum_symbiosum_A : -----RVPTLRGPNNSMNTGLKMTILGYLATMFTIGVNMW
ABY89141_Nitrosopumilus_maritimus_SCM1 : -----KVPVLRGPNNSMNTGLKMTILGYLATMFTIGVNMW
AAU92181_Methylococcus_capsulatus_Bath : IITGFAAFIYAKTRLPFFAKGISLP---YLVLVVGGPFMILPNVGLNEWGH
BAE86884_Methylococcobium_japanense_NI : IITGGASFLYAKTRLPYQOGLS---LQYLVVVVGGPFMILPNVGLNEWGH
CAE47799_Methylocystis_sp_SC_pmoC1 : SVIAGVGFYAKTRLPYFAKGS-YS---VAYLIVAIQPFMILPNVGLNEWGH
CAE48351_Methylocystis_sp_SC2_pmoC2 : IICGGAFMYAHTRIPOFAKR-IS---LAFLMFAGPFMILPNVGLNEWGH
BAF49659_Methylocaldum_sp_T_025_pmoC : IITGGGAFLYAHTRLPYFQTTTKGLSLAYLILWTGPFMILPNVGLNEWGH
AAF37893_Methylosinus_trichosporium_OB3b : SIMAVGAFFYAKTRIPYFAHG-FS---LAFILVAIQPFMILPNVGLNEWGH
CAJ01616_Methylocapsa_acidiphila_pmoC : IITGGVGFYARTRLPTFGSKGS---VAYLIVVGGPFMILPNVGLNEWGH
ABU88150_M_fumariolicum_SolV_pmoC1 : IVAGVGSVMYAMTRLPQYAKAFSVP---YAVLVGSPMLIFPNVGLNEFQH
ABU88151_M_fumariolicum_SolV_pmoC2 : IILGVGSFMYAITRLPMFARFSIP---YAVLVGSPMLIFPNVGLNEFQH
ABU88154_M_fumariolicum_SolV_pmoC3 : INFVAGLMLTRTRLPVGMKWLPL---LVMEVAVMIFMILPILIGNEWGH
ABA58956_Nitrosococcus_oceani_ATCC_19707 : VMVGLGSFTYAKTRIPYFAKGSVP---YLMVLVGGPFMILPNVGLNEWGH
ABI60301_Nitrosomonas_eutropha_C91 : IIVGVATYLYAMTRLPYFHRGISFP---LVMAIAGPLMILPNVGLNEWGH
ABB74105_Nitrosospora_multiformis_25196 : IIVGSIASLYAMTRLPYSRGTSFP---LVMAIAGPLMILPNVGLNEWGH
AAC69319_Nitrosospora_sp_NpAV_amoC1 : IIVGVASLYAMTRLPYARGTSFP---LVMAIAGPLMILPNVGLNEWGH
Methylomirabilis_oxifera_Twente_pmoC2 : IIGISAYMWARTRLPLFSKAHSIP---FMLTVGGPAMIFVNVALNEWGH
Methylomirabilis_oxifera_Twente_pmoC1 : IIGISAYMWARTRLPLFSKAHSIP---FMLTVGGPAMIFVNVALNEWGH
Methylomirabilis_oxifera_Ooij_pmoC1 : IIGINAYMWARTRLPLFSKXXXXP---FMLTVGGPAMIFVNVALNEWGH
Methylomirabilis_oxifera_Ooij_pmoC2 : IIGINAYMWARTRLPLFSKXXXXP---FMLTVGGPAMIFVNVALNEWGH

                                160 * 180 * 200
ABK77035_Cenarchaeum_symbiosum_A : -FWFVEEIFAVPNHWMFNMGVVAFMGALAYVVRVYARLIELGAEPTGEN
ABY89141_Nitrosopumilus_maritimus_SCM1 : -FWFVEEIFAVPNHWMFNMGVVAFMGALAYVVRVYARLIELGAEPTGEN
AAU92181_Methylococcus_capsulatus_Bath : TFWFMEELFVAPLHYGFVIFGWLALA-VMGTLTQTFYFAQGGGLQSLCE
BAE86884_Methylococcobium_japanense_NI : TFWFMEELFVAPLHYGFVFFGWSALG-VLGVNIEBGLSKLLKDLA--
CAE47799_Methylocystis_sp_SC_pmoC1 : TFWFMEELFVAPLHWGFVFFRWMLG-VFGVVLQLLINIQRLIKGEGVAL
CAE48351_Methylocystis_sp_SC2_pmoC2 : TFWFMEELFTAPLHWGFVFFGWFALA-VFGVARQVLDLDRVIELSKYEKDA
BAF49659_Methylocaldum_sp_T_025_pmoC : TFWFMEELFVAPLHYGFVIFGWLALA-IMGVLLQIFASVSN-LMGKEICE
AAF37893_Methylosinus_trichosporium_OB3b : TFWFMEELFVAPLHWGFVFFGWMALG-VFGVVLQILMGVKRLIGKDCVAA
CAJ01616_Methylocapsa_acidiphila_pmoC : TFWFMEELFVAPLHWMFVFFGWFMLS-VFGVSLQLLGRIKELCTGVEDVV
ABU88150_M_fumariolicum_SolV_pmoC1 : TFWFMEELFVAPLHWGFVFMFGWALA-ILGTVLQICPRILELIKQVYVYK
ABU88151_M_fumariolicum_SolV_pmoC2 : TFWFMEELFVAPLHWGFVAFGWFALA-IMGVWLQACPRVYELIKQVYVYK
ABU88154_M_fumariolicum_SolV_pmoC3 : SAWILEEWFAPLHWTVPFPAWAAVW-PLNGFDMFPRIAAVLKATYFGE
ABA58956_Nitrosococcus_oceani_ATCC_19707 : TFWFMEELFVAPLHWGFVFFAWFILA-VFGVFLQVQPRMKELIGRELQOS
ABI60301_Nitrosomonas_eutropha_C91 : TFWFMEELFVAPLHWGFVVLGWAGLF-QGGVAAQIITRYSNLTDVWVWNGQ
ABB74105_Nitrosospora_multiformis_25196 : AFWFMEELFVAPLHWGFVILGWSGLF-AGGIAAQIITRYSNLTDVWVWNGQ
AAC69319_Nitrosospora_sp_NpAV_amoC1 : TFWFMEELFVAPLHWGFVILGWSGLF-AGGIAAQIITRYSNLTDVWVWNGQ
Methylomirabilis_oxifera_Twente_pmoC2 : TFWFMEELFVAPLHWGFVTLGWCLFG-VYGVAAACMPRIFELIRITSGGK
Methylomirabilis_oxifera_Twente_pmoC1 : TFWFMEELFVAPLHWGFVTLGWCLFG-VYGVAAACMPRIFELIRITSGGK
Methylomirabilis_oxifera_Ooij_pmoC1 : TFWFMEELFVAPLHWGFVTLGWCLFG-VYGVAAACMPRIFELIKITSTXXX
Methylomirabilis_oxifera_Ooij_pmoC2 : TFWFMEELFVAPLHWGFVTLGWCLFG-VYGVAAACMPRIFELIKITSTXXX

```

**Supplementary Figure 4** | Alignments of representatives of partial (a) PmoA and AmoA, (b) PmoB and AmoB and (c) PmoC and AmoC sequences, including those from *M. oxyfera* enrichment cultures “Twente” and “Ooij”. Highly conserved positions in both PmoA and AmoA, as identified in ref. 45, are highlighted in yellow, with those positions that differ in *M. oxyfera* shown in red. Positions found to be conserved in the PmoA of all methane oxidisers and different in AmoA of ammonia oxidisers are highlighted in dark green, while those conserved in AmoA of all proteobacterial ammonia oxidisers and differing in PmoA are identified in dark blue. Also positions identified in ref. 44 as zinc ligands (#), mononuclear copper ligands (+) and dinuclear copper ligands (%) in *M. capsulatus* (Bath) pMMO are marked.



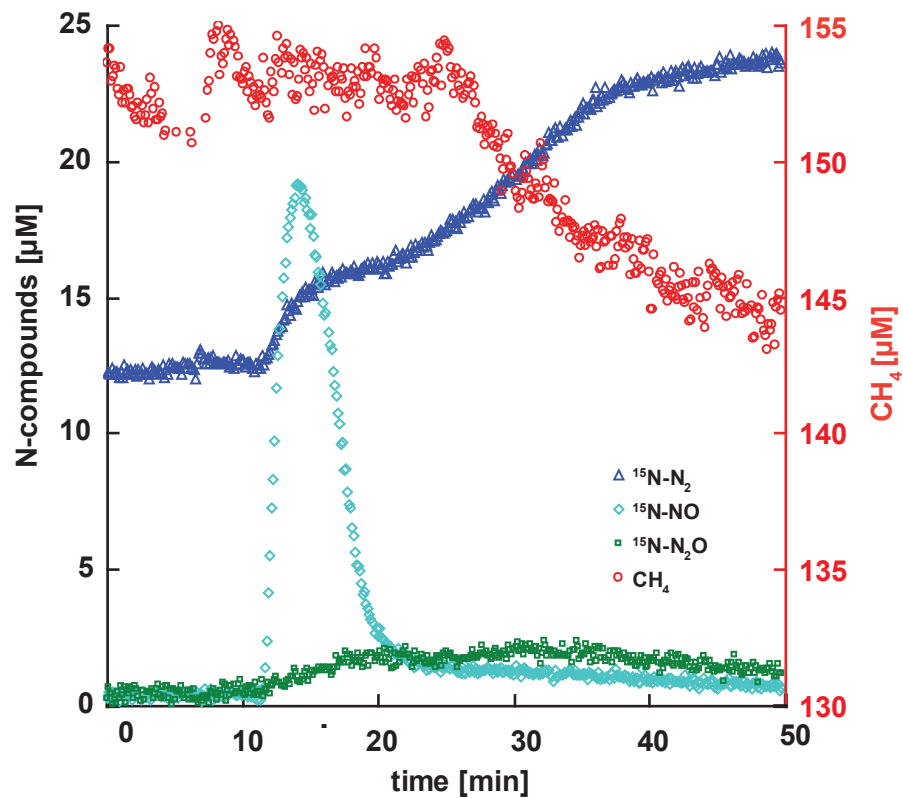

**Supplementary Figure 5** | Production of <sup>15</sup>N-labelled dinitrogen gas and consumption of methane after addition (t = 11 min) of <sup>15</sup>N-labelled nitric oxide (<sup>15</sup>NO). Like nitrite, nitric oxide apparently sustains methane oxidation. Experimental conditions are the same as for Figure 3. Red circles: CH<sub>4</sub>; turquoise diamonds: <sup>15</sup>NO; blue triangles: <sup>15,15</sup>N<sub>2</sub> and <sup>14,15</sup>N<sub>2</sub>; green squares: <sup>15,15</sup>N<sub>2</sub>O and <sup>14,15</sup>N<sub>2</sub>O.

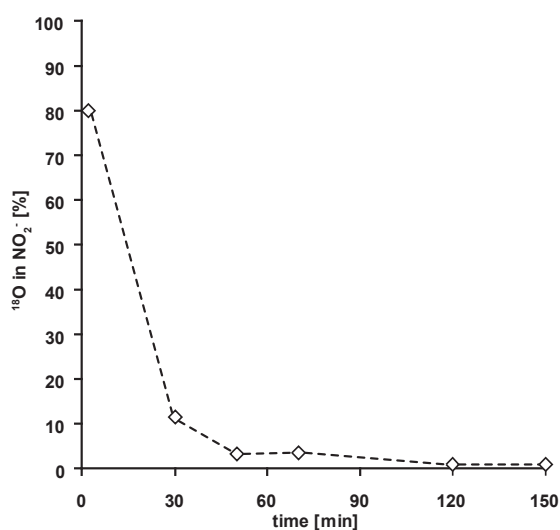

**Supplementary Figure 6** | Oxygen-exchange between <sup>18</sup>O-nitrite and (unlabelled) water mediated by *M. oxyfera* enrichment culture “Ooij”. <sup>18</sup>O-labelled NO<sub>2</sub><sup>-</sup> was prepared according to ref. 50, and the labelling percentage was measured by GC-MS as described in the method section after conversion to N<sub>2</sub>O (ref. 51). Control incubations of <sup>18</sup>O-NO<sub>2</sub><sup>-</sup> in identical medium without biomass showed no measurable O-exchange over a period of 4 h.

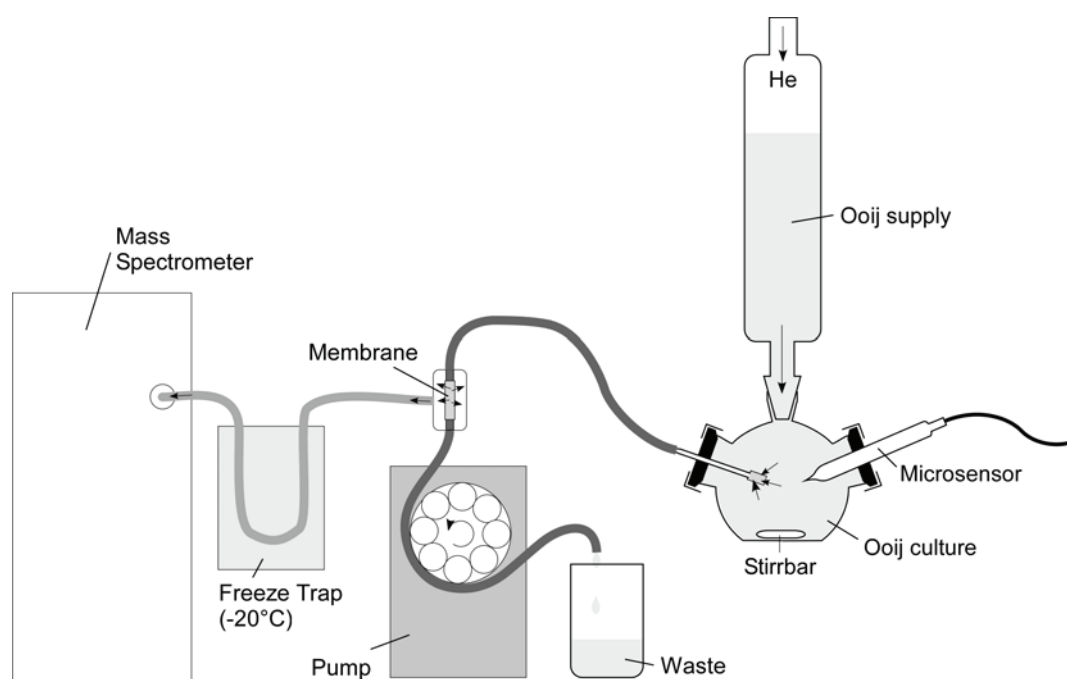

**Supplementary Figure 7** | Schematic setup for the measurement of nitrogenous intermediates by microsensors and membrane-inlet mass spectrometry (see Figure 3 and Supplementary Figure 5).
